# Supplementary material
Source: PubMed Central journal article supplement (PMC2746735)
Supplement: NIHMS139077-supplement-online_data_supplement.pdf [file NIHMS139077-supplement-online_data_supplement.pdf]

## **SUPPLEMENTAL MATERIAL**

### **Supplemental Methods**

#### **Regional Ischemia *In Vivo***

Male adult mice (B6129SF2/JF2, 10-12-weeks old) were anesthetized with sodium pentobarbital (90 mg/kg IP), intubated with PE 90 tubing, and ventilated by use of a mouse miniventilator (Harvard Apparatus) with room air supplemented with oxygen. ECG electrodes were placed subcutaneously, and data were recorded with a Digi-Med Sinus Rhythm Analyzer (Micro-Med). A lateral thoracotomy (1.5-cm incision between the second and third ribs) was performed to provide exposure of the left anterior descending coronary artery (LAD), while avoiding rib and sternal resection, retraction, and rotation of the heart. Vascular bundles in the vicinity were coagulated by use of a microcoagulator (Medical Industries). An 8-0 nylon suture was placed around the LAD at 2 to 3 mm from the tip of the left auricle, and a piece of soft silicon tubing (0.64 mm ID, 1.19 mm OD) was placed over the artery. All mice were subjected to a 30-minute coronary occlusion by tightening and tying the suture. Ischemia was confirmed by visual observation (cyanosis) and continuous ECG monitoring. After 24 hours of reperfusion, the aorta was cannulated, and the hearts were quick frozen in liquid N<sub>2</sub> for further experiments or perfused with 1% TTC (37°C, 60 mmHg) as previously described.<sup>1</sup> The occluder, which had been left in place, was retied, and the heart was perfused with 5% phthalo blue. Hearts were transversely cut into 5 to 6 sections, with 1 section made at the site of the ligature. Infarct sizes were determined and expressed as a percentage of the region at risk.

#### **microRNA Extraction, miRNA-Microarray and Quantitative RT-PCR**

miRNAs were isolated from mouse hearts (B6129SF2/JF2, 10~12-weeks old) after 30-min ischemia, via left anterior descending (LAD) coronary artery occlusion, followed by 24-h reperfusion or from mouse hearts (FVB/N) subjected to 45-min no-flow global ischemia and 2-h reperfusion *ex vivo*, using the mirVana miRNA isolation kit (Ambion, Inc., Austin, TX), according to the manufacturer's protocol. The concentration of RNA was determined by a NanoDrop ND-1000 Spectrophotometer (NanoDrop Tech., Rockland, DE). miRNA expression profiling was determined by miRNA microarray analysis using the mouse miRNA array probes (mirVana™ miRNA Bioarrays Version 2, Ambion, Inc., Austin, TX) that include 266 mature mouse miRNAs. Dysregulated miRNAs were validated by using the *mirVana*™ qRT-PCR miRNA Detection Kit TaqMan miRNA assays. Primer sets for these miRNAs including control snoRNA412 were purchased from Ambion, Inc. (Austin, TX). All RT reactions, including no-template controls and RT minus controls, were run in triplicate in a GeneAmp PCR 9700 Thermocycler (Applied Biosystems). Relative expression was calculated using the comparative threshold cycle (Ct) method, as previous described.<sup>2</sup>

### Microarray Data Analysis

The data generated by GenePix® Pro version 5.0 software were analyzed to identify differentially expressed miRNAs. Data normalization was performed in two separate steps for each microarray.<sup>3</sup> First, background adjusted intensities were log-transformed and the differences ( $M$ ) and averages ( $A$ ) of log-transformed values were calculated as  $M = \log_2(X_1) - \log_2(X_2)$  and  $A = [\log_2(X_1) + \log_2(X_2)]/2$ , where  $X_1$  and  $X_2$  denote the Cy5 and Cy3 intensities, respectively. Second, normalization was performed by fitting the array-specific local regression model of  $M$  as a function of  $A$ . Normalized log intensities for the two channels were then calculated by adding half of the normalized ratio to  $A$  for the Cy5 channel and subtracting half of

the normalized ratio from *A* for the Cy3 channel. Statistical analysis was performed for each gene separately by fitting an analysis of variance model,<sup>4,5</sup> and calculating significance levels using an intensity-based empirical Bayesian moderated *t* statistic (IBMT).<sup>6</sup> Estimates of fold change were calculated for each miRNA, and p-values were adjusted for multiple testing by controlling the false discovery rate (FDR). Data analysis was performed using the statistical software R.

### **Cell Culture and Construction of Adenoviral Vectors**

The cell lines used in this study were purchased from the American Type Culture Collection (ATCC, Manassas, VA). H9c2 (rat ventricular cell line) and HEK293 (human embryonic kidney cell line) were cultured in Dulbecco's Modified Eagle Medium (DMEM). The cultures were supplemented with 10% fetal bovine serum and 100 µg/ml penicillin/streptomycin. Primary miR-320 DNA was PCR-amplified from mouse genomic DNA using high fidelity AccuPrime Taq DNA polymerase (Invitrogen). After sequencing, the amplified fragment (470 bp) was first subcloned in pcDNA3 (Invitrogen), then inserted under the CMV promoter into the AdEasy-1/Shuttle backbone, similar to our previous construction of adenoviral vectors.<sup>7-9</sup> Antisense miR-320 adenovirus (named as Ad.asmiR320) was generated by cloning the miR-320 primary DNA in the reverse orientation relative to the CMV promoter. The recombinant viruses were amplified in HEK 293 cells, prepared as high-titer stocks and further purified by CsCl banding. Viral particle titration was performed by using plaque assay. Briefly, multiple dilutions of virus were plated out with proper amount of 293 cells. When there were individual plaques observed and evenly distributed, the individual plaque number was counted and the plaque forming units per mL (pfu) were obtained by multiplying the count by the dilution factor.

## **Preparation and Infection of Adult Rat Cardiomyocytes**

Adult rat ventricular myocytes were obtained from Langendorff-perfused hearts of 2-month-old male Sprague-Dawley rats (Harlan Laboratory) at 37°C, as described before.<sup>7, 8</sup> Briefly, rats were anesthetized with sodium pentobarbital (50mg/kg IP) and heparinized (10,000U/kg IP). The hearts were perfused with modified Krebs-Henseleit buffer (KHB) (in mmol/L: NaCl: 118, KCl: 4.8, HEPES: 25, K<sub>2</sub>PO<sub>4</sub>: 1.25, MgSO<sub>4</sub>: 1.25, glucose: 11, taurine: 5 and BDM: 10, pH7.4) for 5 minutes. Hearts were then perfused with an enzyme solution, which contained 0.7mg/mL collagenase type II (263U/mg), 0.2mg/mL hyaluronidase, 0.1% BSA and 25μM Ca<sup>2+</sup>, for 10 minutes. Subsequently, the Ca<sup>2+</sup> concentration in the perfusion buffer was raised to 100μM, and perfusion continued for 5 additional minutes. Finally, ventricular tissue was excised, minced, pipette-dissociated, and filtered through a 240-μm screen. Cells were harvested and resuspended in 1.8mM Ca<sup>2+</sup>-KHB with 1% BSA, centrifuged briefly again, and resuspended in ACCT medium consisting of DMEM containing 2mg/mL BSA, 2mM L-carnitine, 5mM creatine, 5mM taurine, 100IU/mL penicillin, and 100ug/mL streptomycin. Cells were then counted and plated on laminin-coated glass coverslips or dishes. After 1-2 hours, the dishes were infected with adenoviruses in diluted media, at a multiplicity of infection of 500, for 2 hours before addition of suitable volume of culture media. Transfection efficiency, determined by GFP gene expression in the cultured cardiac myocytes under fluorescence microscopy, was nearly 100% after 48-h by this method. For detection of miR320 and Hsp20 expression, the cultured rat cardiomyocytes were harvested after 60-h of adenoviral infection.

## **Northern Blot Detection of miR-320 Expression**

miR-320 expression was detected in 15 µg of total RNA from snap-frozen tissues and cardiac myocytes, which were loaded onto a precast 15% denaturing polyacrylamide gel (Bio-Rad, Hercules, CA). The RNA was then electrophoretically transferred to Bright-Star blotting membranes (Ambion, Inc.). Prehybridization and hybridization were performed in Ultrahyb Oligo solution (Ambion, Inc.), containing  $10^6$  cpm/ml probes, overnight at 37°C. The most stringent wash was with standard saline citrate (2×) and 1% sodium dodecyl sulfate at 37°C. U6 was used as a loading control to normalize expression levels. miR-320 probe sequence: 5'-TTCGCCCTCTCAACCCAGCTTTT-3'; U6 probe sequence: 5'-GCAGGGGCCATGCTAATCTTCTCTGTATCG-3'.

### **Simulated Ischemia/Reperfusion Treatment and Cell Survival Assay**

After 60-h of infection, cardiomyocytes were cultured in ischemia buffer (1.13 mM CaCl<sub>2</sub>, 5 mM KCl, 0.3 mM KH<sub>2</sub>PO<sub>4</sub>, 0.5 mM MgCl<sub>2</sub>, 0.4 mM MgSO<sub>4</sub>, 128 mM NaCl, 4 mM NaHCO<sub>3</sub>, 10 mM HEPES, pH 6.8), and placed into a hypoxic chamber (37°C, 1% O<sub>2</sub>, 20% CO<sub>2</sub> and 79% N<sub>2</sub>) for 1-h, followed by reperfusion for 3-h under normal culture conditions. We chose the simulated ischemia/reperfusion protocol instead to use hydrogen peroxide treatment, because it may mimic the conditions, occurred during ischemia/reperfusion-induced injury *in vivo*. In particular, the ischemic buffer was designed to reflect the ionic constituents and lack of glucose in the cell during ischemia. In addition, the cells were exposed to 1% O<sub>2</sub> and 20% CO<sub>2</sub> to mimic the hypoxic and hypercapnic conditions in the cell during ischemia. To initiate reperfusion, the ischemic buffer was replaced with normal media and returned to an incubator with normoxic conditions (21% O<sub>2</sub>, 5% CO<sub>2</sub>). Cardiomyocyte cell viability assessment was performed with the CellTiter 96 Aqueous One Solution Cell Proliferation Assay Kit (Promega), per manufacturer's instructions. For apoptosis analysis, DNA fragmentation was determined by an ELISA kit

(Roche Applied Science, Indianapolis, IN). Cardiomyocytes were lysed by gently dispersing the pellet using a pipette tip that was cut back to prevent shearing of cells and release of nuclear DNA. The extract was then centrifuged at low speed and assayed according to the manufacturer's instructions. Fold increase was obtained by dividing the measured absorbance of an experimental group by the absorbance of the positive control, provided in the kit. *In situ* DNA fragmentation was assessed using the Hoechst staining kit (Invitrogen).

### **Generation of a miR-320 Transgenic Mouse Model**

Transgenic (TG) mice (FVB/N) were constructed by using a 470 bp DNA fragment containing murine primary miR-320 DNA under the control of the  $\alpha$ -myosin heavy chain promoter ( $\alpha$ -MHCp). The following primer set was used to generate the murine primary miR-320.

Forward primer: 5' CAGAGTCGACTAGCTTTGGACTCCGTCAC-3';

Reverse primer: 5' GTCTAAGCTTCCACATACAGCAGGTAGGCGAC-3'.

The TG lines were screened by routine genotyping, performed by PCR with the use of an upper primer from the  $\alpha$ -MHC promoter (5'-CACATAGAAGCCTAGCCCACAC-3') and a lower primer from the miR-320 DNA (5'-CCACATACAGCAGGTAGGCGAC-3') to amplify a 550-bp fragment spanning the junction between the  $\alpha$ -MHC promoter and miR-320 DNA. The control PCR was set up to amplify a 350-bp fragment of TSH- $\beta$  using an upstream primer: 5'-TCCTCAAAGATGCTCATTAG-3' and a downstream primer: 5'-GTA ACTCACTCATGCAAAGT-3'. The expression levels of miR-320 were detected by Northern blot, as described in the Methods.

### **Global Ischemia *Ex Vivo* and Cardiac Injury Analysis**

The cellular and functional responses to I/R were assessed in mice by using an isolated perfused heart model, as previously described.<sup>10</sup> Briefly, hearts from TG and WT mice were mounted on a Langendorff apparatus, and perfused with Krebs–Henseleit buffer. Temperature was maintained constant at 37 °C by water-jacketed glassware for a heart chamber, buffer reservoirs, and perfusion lines. In addition, an overhead light source was used to ensure maintenance of temperature during ischemia, which was monitored by a thermometer placed close to the perfused heart in the glass chamber. A water-filled balloon made of plastic film was inserted into the left ventricle and adjusted to achieve a left ventricular end-diastolic pressure (LVEDP) of 5 to 10 mmHg. The distal end of the catheter was connected to a Heart Performance Analyzer (Micro-Med) via a pressure transducer. Hearts were paced at 400 bpm except during ischemia, and pacing was re-initiated 2 min after reperfusion. After a 30-min equilibration period, hearts were subjected to 30 min of no-flow global ischemia, followed by 60 min of reperfusion. The LVEDP, left ventricular developed pressure (LVDP), maximum rate of contraction (+dP/dt), and maximum rate of relaxation (–dP/dt) were monitored during this process.

Cardiac injury was assessed by measuring lactate dehydrogenase (LDH) release. Perfusion effluent was collected every 10 minutes of pre-ischemia and also during reperfusion. Total LDH released from the heart was determined using an *in vitro* Toxicology Assay Kit (Sigma) and expressed as units per ml of wet heart weight (U/ml/g). PK/LDH enzyme (Sigma, #P-0294) was used as a standard control.

DNA fragmentation was measured in heart homogenates (100 µg from each heart) using the commercial assay kit Cell Death Detection ELISA<sup>PLUS</sup> (Roche). Results were normalized to the standard provided in the kit and expressed as percentage of control.

### **In Vivo Administration of Antagomir-320**

Chemically modified antisense oligonucleotides (antagomir) have been used to inhibit microRNA expression *in vivo*<sup>11-14</sup>. Antagomirs were synthesized by Dharmacon (www.dharmacon.com). Sequences are 5'-u<sub>s</sub>c<sub>s</sub>gccccucucaaccagcu<sub>s</sub>u<sub>s</sub>u<sub>s</sub>u<sub>s</sub>- Chol-3' (antagomir-320), 5'-u<sub>s</sub>c<sub>s</sub>gccccucucaaccgaga<sub>s</sub>c<sub>s</sub>c<sub>s</sub>u<sub>s</sub>- Chol-3' (antagomir-320-mutant as control). Lower case letters represent 2'-O-Methyl-modified oligonucleotides, subscript 's' represents a phosphorothioate linkage, 'Chol' represents linked cholesterol, and underlined letters are mutated seed sequence. Antagomir oligonucleotides were deprotected, desalted and purified by high-performance liquid chromatography. FVB/N male mice (6-weeks old) received either antagomir-320 or mutant antagomir-320 at a dose of 80 mg/kg body weight or a comparable volume of saline (200 µl) through tail vein injection. Regional ischemia *in vivo* was performed at 3 days after treatment.

### **Western Blot Analysis**

The protein samples were extracted from hearts or cultured cells, with the procedures as described in detail elsewhere.<sup>15</sup> Protein samples (10µg) were fractionated by SDS-PAGE. A primary antibody against Hsp20 (1:5000 dilution, Research Diagnostics Inc) was used; α-actin (1:1000 dilution, Sigma-Aldrich) or calsequestrin (CSQ, 1:4000 dilution, Affinity Bioreagents Inc) was performed as an internal control. Mouse wild-type pooled heart homogenates or cardiomyocyte lysates were used as a standard control on each gel, to assure that the immunoblot



signal for each protein target was within the dynamic range of detection and that the signal saturation had not occurred. Each protein of interest to be quantitated, which is calculated from “a standard curve” generated from the densities of a serial of standard protein concentration (e.g. 5  $\mu$ g, 10  $\mu$ g, and 20  $\mu$ g), then normalized to a loading control (e.g.  $\alpha$ -actin, or CSQ).

### **GFP Repression Experiments**

For GFP repression, a Hsp20 3'-UTR segment of 83 bp was amplified by PCR from mouse genomic DNA and inserted into the *Bam*HI-*Eco*RI cloning sites located 3' of the GFP encoding sequence of the QBI-GFP25 vector (Autofluorescent Proteins), as previously described.<sup>16</sup> H9c2 cells were co-transfected with the indicated miRNAs (100 nM) along with the construct expressing their putative target transcripts as indicated. Pictures were taken 48 h after transfection using a Zeiss microscope. The following primer set was used to generate Hsp20 3'-UTR fragment: forward, 5'- GTCT GGATCC AAC CTA GAC AGC CTC -3'; reverse, 5'- GACA GAATTC CTA GAG AGG TGT CCT G -3'; underlined sequences indicate the endonuclease restriction site.

### **Luciferase Reporter Assay for Targeting Hsp20 3'-UTRs**

For luciferase reporter experiments, an Hsp20 3'-UTR segment of 84 bp was amplified by PCR from mouse genomic DNA and inserted into the pMIR-REPORT<sup>TM</sup> luciferase miRNA expression reporter vector (Ambion, Inc.) at the *Spe*I and *Hind*III sites. The following set of primers were used to generate specific fragments: Hsp20-UTR forward, 5'- GACA ACTAGT AAC CTA GAC AGC CTC -3'; For mutated Hsp20-UTR, forward primer: 5'- GACA ACTAGT AAC CTA GAC AGC CTC CCT AAG CCC TCT CCgacacaaC -3' (lowercase bases constitute the mutated seed sequence of miR-320). Hsp20-UTR reverse, 5'- GACT AAGCTT C CTA

GAG AGG TGT CCT G -3'; underlined sequences indicate the endonuclease restriction site. HEK293 or H9c2 cells were cotransfected in 12-well plates using Lipofectamine 2000 reagent (Invitrogen) according to the protocol of the manufacturer, with 0.4  $\mu$ g of the Hsp20-UTR luciferase reporter vector and 0.08  $\mu$ g of the control vector pMIR-REPORT (Ambion, Inc.). For each well, 100 nM (final) precursor miR-320 or scrambled miRNA (Ambion, Austin, TX) was used. Cell lysates were prepared 72-h later, and luciferase activity was measured, using a Monolight 3010 luminometer (PharMingen), and expressed as relative light units using a luciferase assay kit (Promega).  $\beta$ -galactosidase activity was measured with a commercially available kit (Promega). 3'UTR activity of each construct was expressed as the ratio of luciferase/ $\beta$ -galactosidase activity. All transfections were performed in triplicate from three independent experiments.

### **Statistical Analysis**

All values are expressed as mean  $\pm$  SEM. Student's *t*-test was used for two-group comparisons. Comparisons of parameters among 3 or more groups were analyzed by 1-way ANOVA for single factor, or 2-way ANOVA for two-factor variables with repeated measures, followed by Student's *t*-test with Bonferroni's correction for multiple-comparison. Differences were considered statistically significant at a value of  $P < 0.05$ .

Supplemental Figures and Tables

**Figure S1. Summary of miRNA Array on Expressed miRNAs in Wild-Type Murine Heart**

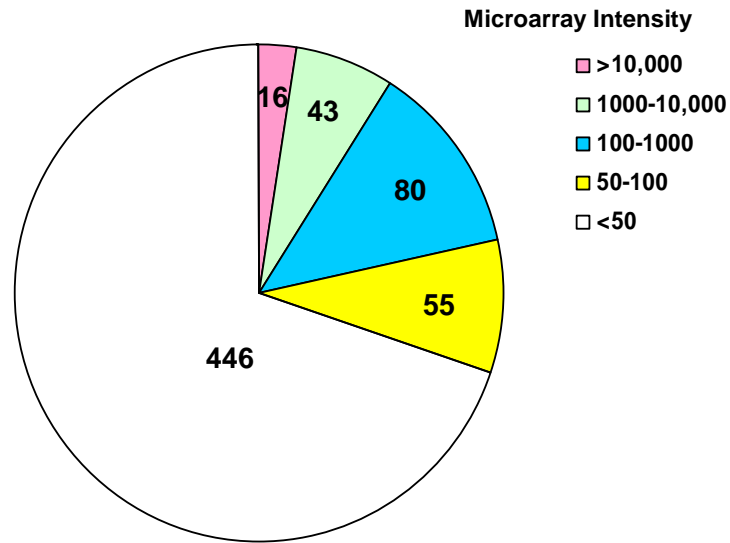

**Table S1. miRNAs Highly Expressed in Normal Mouse Heart**

| MicroRNA   | Averaged Microarray Intensity | MicroRNA | Averaged Microarray Intensity |
|------------|-------------------------------|----------|-------------------------------|
| let-7c     | 22484                         | miR-24   | 12412                         |
| let-7b     | 20762                         | miR-133b | 11535                         |
| miR-126-3P | 19254                         | miR-422b | 11319                         |
| let-7a     | 14926                         | miR-1    | 11224                         |
| miR-23b    | 14153                         | Let-7d   | 11026                         |
| miR-29a    | 12943                         | miR-22   | 10712                         |
| miR-23a    | 12580                         | miR-16   | 10074                         |
| miR-133a   | 12469                         | miR-26a  | 10052                         |

**Supplemental Table S2: MicroRNA array raw data from the murine heart upon *in vivo* 30-min-ischemia followed by 24 h reperfusion (Labeled as IR) and *ex vivo* 45-min global no-flow ischemia followed by 2 h reperfusion (Labeled as I45R)**

| Name           | Intensities averaged over probes |      |      |      | Average fold |          | p-values |           | false discovery rates |         | Std error (log2 scale) |         |
|----------------|----------------------------------|------|------|------|--------------|----------|----------|-----------|-----------------------|---------|------------------------|---------|
|                | IR                               | Sham | I45R | Con  | IR/Sham      | I45R/Con | pIR/Sham | pI45R/Con | fdrIR                 | fdrI45R | SE.IR                  | SE.I45R |
| ambi_miR_1006  | 16                               | 13.7 | 3.5  | 6.26 | 1.20         | NA       | NA       | NA        | NA                    | NA      | NA                     | NA      |
| ambi_miR_10064 | 17.7                             | 19.5 | 15.1 | 12   | -1.06        | 1.34     | 0.68881  | NA        | 0.92294               | NA      | 0.473                  | NA      |
| ambi_miR_10133 | 134                              | 218  | 122  | 95.5 | -1.58        | 1.38     | 0.04628  | 0.10902   | 0.45703               | 0.53707 | 0.332                  | 0.218   |
| ambi_miR_10202 | 8.1                              | 6.15 | 8.44 | 7.71 | NA           | 1.05     | NA       | NA        | NA                    | NA      | NA                     | NA      |
| ambi_miR_10203 | 15.6                             | 20.1 | 14.1 | 14.3 | -2.09        | 1.06     | 0.03891  | NA        | 0.43421               | NA      | 0.440                  | NA      |
| ambi_miR_10394 | 8.61                             | 3.22 | 10.6 | 8.7  | NA           | NA       | NA       | NA        | NA                    | NA      | NA                     | NA      |
| ambi_miR_10411 | 11.1                             | 8.6  | 6.84 | 7.45 | NA           | NA       | NA       | NA        | NA                    | NA      | NA                     | NA      |
| ambi_miR_10594 | 91.6                             | 129  | 108  | 67.9 | -1.38        | 1.54     | 0.02723  | 0.00075   | 0.36213               | 0.03886 | 0.256                  | 0.200   |
| ambi_miR_10617 | 87.8                             | 107  | 52.8 | 48.1 | -1.19        | 1.19     | 0.50248  | 0.08269   | 0.85276               | 0.50095 | 0.247                  | 0.219   |
| ambi_miR_10751 | 145                              | 185  | 116  | 84.4 | -1.43        | 1.34     | 0.04577  | 0.03050   | 0.45703               | 0.33941 | 0.228                  | 0.199   |
| ambi_miR_10766 | 51.1                             | 47   | 38.2 | 32.9 | 1.06         | 1.08     | 0.89846  | 0.67227   | 0.98314               | 0.87158 | 0.288                  | 0.257   |
| ambi_miR_10769 | 5.9                              | 4.16 | 5.76 | 4.85 | NA           | NA       | NA       | NA        | NA                    | NA      | NA                     | NA      |
| ambi_miR_10994 | 69.2                             | 58.4 | 54.5 | 45   | 1.18         | 1.13     | 0.42243  | 0.27130   | 0.82429               | 0.63334 | 0.312                  | 0.224   |
| ambi_miR_11040 | 17.1                             | 7.94 | 7.84 | 10.6 | 1.31         | NA       | NA       | NA        | NA                    | NA      | NA                     | NA      |
| ambi_miR_11143 | 17.4                             | 10.3 | 8.41 | 11.2 | 1.26         | NA       | NA       | NA        | NA                    | NA      | NA                     | NA      |
| ambi_miR_11146 | 30                               | 10.3 | 17.3 | 11.7 | 2.82         | 1.55     | NA       | NA        | NA                    | NA      | NA                     | NA      |
| ambi_miR_11168 | 7.15                             | 3.22 | 4.93 | 4.58 | NA           | NA       | NA       | NA        | NA                    | NA      | NA                     | NA      |
| ambi_miR_1137  | 9.54                             | 3.62 | 2.74 | 8.08 | NA           | NA       | NA       | NA        | NA                    | NA      | NA                     | NA      |
| ambi_miR_11541 | 6.56                             | 6.28 | 6.39 | 5.76 | NA           | NA       | NA       | NA        | NA                    | NA      | NA                     | NA      |
| ambi_miR_11576 | 12                               | 13.7 | 7.25 | 9.63 | NA           | NA       | NA       | NA        | NA                    | NA      | NA                     | NA      |
| ambi_miR_11700 | 8.67                             | 8.84 | 7.36 | 8.78 | -2.01        | -1.20    | NA       | NA        | NA                    | NA      | NA                     | NA      |
| ambi_miR_11786 | 8.91                             | 5.51 | 5.42 | 5.74 | NA           | NA       | NA       | NA        | NA                    | NA      | NA                     | NA      |
| ambi_miR_11835 | 16.9                             | 8.78 | 15.6 | 8.4  | NA           | 1.39     | NA       | NA        | NA                    | NA      | NA                     | NA      |
| ambi_miR_12061 | 65.7                             | 59.9 | 58.9 | 45.6 | 1.07         | 1.22     | 0.87161  | 0.32507   | 0.97464               | 0.67215 | 0.285                  | 0.227   |
| ambi_miR_12110 | 8.36                             | 6.27 | 7.56 | 5.08 | NA           | 2.25     | NA       | NA        | NA                    | NA      | NA                     | NA      |
| ambi_miR_12152 | 15.3                             | 6.63 | 7.69 | 9.23 | 1.53         | 1.44     | NA       | NA        | NA                    | NA      | NA                     | NA      |
| ambi_miR_12180 | 19.4                             | 10.9 | 11.8 | 7.39 | 2.24         | 1.52     | NA       | NA        | NA                    | NA      | NA                     | NA      |
| ambi_miR_12314 | 6.19                             | 4.52 | 3.67 | 4.02 | NA           | NA       | NA       | NA        | NA                    | NA      | NA                     | NA      |
| ambi_miR_12628 | 16.3                             | 4.23 | 6.61 | 7.94 | NA           | NA       | NA       | NA        | NA                    | NA      | NA                     | NA      |
| ambi_miR_1265  | 76.4                             | 117  | 61   | 51.6 | -1.50        | 1.28     | 0.05648  | 0.08753   | 0.49151               | 0.50484 | 0.260                  | 0.221   |
| ambi_miR_12897 | 91.4                             | 128  | 64.8 | 54.7 | -1.41        | 1.18     | 0.36847  | 0.31335   | 0.81606               | 0.66752 | 0.254                  | 0.211   |
| ambi_miR_12902 | 4.8                              | 4.97 | 4    | 3.41 | NA           | NA       | NA       | NA        | NA                    | NA      | NA                     | NA      |
| ambi_miR_12969 | 6.86                             | 2.73 | 4.01 | 7.07 | NA           | NA       | NA       | NA        | NA                    | NA      | NA                     | NA      |
| ambi_miR_13090 | 32.4                             | 29.4 | 10.9 | 16   | 1.07         | 1.07     | 0.48210  | NA        | 0.84737               | NA      | 0.323                  | NA      |
| ambi_miR_13100 | 25.6                             | 32.3 | 18.2 | 18.6 | -1.30        | 1.06     | 0.52875  | 0.56146   | 0.86470               | 0.83904 | 0.357                  | 0.295   |
| ambi_miR_13118 | 5.73                             | 3.48 | 5.8  | 4.77 | NA           | NA       | NA       | NA        | NA                    | NA      | NA                     | NA      |
| ambi_miR_13124 | 16.1                             | 15.4 | 12.4 | 11.3 | -1.28        | 1.12     | NA       | NA        | NA                    | NA      | NA                     | NA      |
| ambi_miR_13143 | 5.59                             | 10.4 | 5.5  | 4.19 | NA           | NA       | NA       | NA        | NA                    | NA      | NA                     | NA      |
| ambi_miR_13145 | 10.5                             | 6.1  | 4.91 | 3.49 | NA           | NA       | NA       | NA        | NA                    | NA      | NA                     | NA      |
| ambi_miR_13156 | 21.9                             | 28.3 | 16.5 | 17.2 | -1.24        | -1.10    | 0.97179  | 0.63911   | 0.99699               | 0.86497 | 0.389                  | 0.357   |
| ambi_miR_13178 | 55.2                             | 71   | 46.9 | 38.9 | -1.26        | 1.25     | 0.48881  | 0.60595   | 0.85202               | 0.85977 | 0.274                  | 0.228   |
| ambi_miR_13182 | 5.53                             | 6.18 | 6.81 | 6.11 | NA           | 3.05     | NA       | NA        | NA                    | NA      | NA                     | NA      |
| ambi_miR_13190 | 17.5                             | 19   | 10.8 | 10.2 | -1.41        | 1.43     | NA       | NA        | NA                    | NA      | NA                     | NA      |

|                |      |      |      |      |       |       |         |         |         |         |       |       |
|----------------|------|------|------|------|-------|-------|---------|---------|---------|---------|-------|-------|
| ambi_miR_13193 | 1076 | 868  | 474  | 422  | 1.20  | 1.03  | 0.33843 | 0.80727 | 0.80962 | 0.92015 | 0.241 | 0.155 |
| ambi_miR_13196 | 5.28 | 3.08 | 2.45 | 3.23 | NA    | NA    | NA      | NA      | NA      | NA      | NA    | NA    |
| ambi_miR_13197 | 13.3 | 8.82 | 7.28 | 8.66 | -1.23 | NA    | NA      | NA      | NA      | NA      | NA    | NA    |
| ambi_miR_13203 | 6.11 | 6.19 | 8.49 | 5.58 | NA    | NA    | NA      | NA      | NA      | NA      | NA    | NA    |
| ambi_miR_13205 | 843  | 916  | 375  | 379  | -1.10 | -1.05 | 0.67481 | 0.68485 | 0.91902 | 0.88051 | 0.248 | 0.154 |
| ambi_miR_13209 | 9.47 | 3.8  | 5.35 | 4.18 | NA    | NA    | NA      | NA      | NA      | NA      | NA    | NA    |
| ambi_miR_13232 | 4451 | 2824 | 3251 | 1202 | 1.28  | 2.50  | 0.12117 | 0.00001 | 0.60195 | 0.00251 | 0.277 | 0.190 |
| ambi_miR_13237 | 9.75 | 2.4  | 8.27 | 4.68 | NA    | NA    | NA      | NA      | NA      | NA      | NA    | NA    |
| ambi_miR_13255 | 27.9 | 19.9 | 5.99 | 9.91 | 1.28  | -2.07 | NA      | NA      | NA      | NA      | NA    | NA    |
| ambi_miR_13258 | 58.5 | 57.8 | 29.5 | 38.9 | 1.07  | -1.31 | 0.55914 | 0.00806 | 0.87869 | 0.16872 | 0.400 | 0.270 |
| ambi_miR_13259 | 13.8 | 7.95 | 7.31 | 7.58 | NA    | NA    | NA      | NA      | NA      | NA      | NA    | NA    |
| ambi_miR_13260 | 8.88 | 5.5  | 3.91 | 3.93 | NA    | NA    | NA      | NA      | NA      | NA      | NA    | NA    |
| ambi_miR_13266 | 8.08 | 9    | 3.36 | 5.48 | NA    | NA    | NA      | NA      | NA      | NA      | NA    | NA    |
| ambi_miR_13268 | 565  | 662  | 220  | 250  | -1.19 | -1.15 | 0.14411 | 0.39706 | 0.63364 | 0.72546 | 0.243 | 0.183 |
| ambi_miR_14    | 16.3 | 20.2 | 5.5  | 9.77 | NA    | NA    | NA      | NA      | NA      | NA      | NA    | NA    |
| ambi_miR_14204 | 15.2 | 15.9 | 7    | 8.49 | -1.02 | NA    | 0.75768 | NA      | 0.94768 | NA      | 0.473 | NA    |
| ambi_miR_1481  | 23.8 | 23   | 26.3 | 21   | 1.02  | 1.24  | 0.51431 | 0.25946 | 0.86192 | 0.63284 | 0.435 | 0.359 |
| ambi_miR_16    | 72.4 | 104  | 49   | 51.1 | -1.40 | 1.05  | 0.30236 | 0.19114 | 0.80227 | 0.60917 | 0.261 | 0.230 |
| ambi_miR_2537  | 7.72 | 4.59 | 5.73 | 5.78 | NA    | NA    | NA      | NA      | NA      | NA      | NA    | NA    |
| ambi_miR_2660  | 7.21 | 5.12 | 4.28 | 4.86 | NA    | NA    | NA      | NA      | NA      | NA      | NA    | NA    |
| ambi_miR_279   | 4.87 | 3.11 | 5.92 | 4.5  | NA    | -2.06 | NA      | NA      | NA      | NA      | NA    | NA    |
| ambi_miR_2825  | 9.73 | 5.52 | 3.4  | 5.28 | NA    | NA    | NA      | NA      | NA      | NA      | NA    | NA    |
| ambi_miR_2837  | 7.42 | 2.88 | 3.98 | 2.94 | NA    | NA    | NA      | NA      | NA      | NA      | NA    | NA    |
| ambi_miR_3046  | 6.36 | 3.13 | 7.64 | 4.33 | NA    | NA    | NA      | NA      | NA      | NA      | NA    | NA    |
| ambi_miR_3121  | 7.17 | 8.09 | 4.25 | 2.61 | NA    | NA    | NA      | NA      | NA      | NA      | NA    | NA    |
| ambi_miR_3135  | 10.1 | 12.4 | 5.04 | 8.05 | NA    | 2.19  | NA      | NA      | NA      | NA      | NA    | NA    |
| ambi_miR_358   | 9.99 | 3.84 | 3.62 | 5.16 | NA    | NA    | NA      | NA      | NA      | NA      | NA    | NA    |
| ambi_miR_371   | 17.8 | 17.5 | 13.7 | 16.8 | -1.02 | 1.13  | 0.77682 | 0.69785 | 0.95626 | 0.88138 | 0.454 | 0.447 |
| ambi_miR_3898  | 13.2 | 11.3 | 13   | 13.4 | 1.23  | 1.23  | NA      | 0.69175 | NA      | 0.88138 | NA    | 0.695 |
| ambi_miR_3998  | 7699 | 7782 | 3440 | 3131 | -1.11 | 1.04  | 0.83964 | 0.02022 | 0.97138 | 0.29240 | 0.306 | 0.185 |
| ambi_miR_408   | 9.76 | 4.23 | 2.58 | 4.24 | NA    | NA    | NA      | NA      | NA      | NA      | NA    | NA    |
| ambi_miR_4209  | 39.2 | 42.7 | 24   | 19.1 | -1.20 | 1.19  | 0.96674 | 0.18095 | 0.99699 | 0.60917 | 0.317 | 0.510 |
| ambi_miR_4400  | 7.62 | 6.75 | 4.24 | 5.49 | NA    | NA    | NA      | NA      | NA      | NA      | NA    | NA    |
| ambi_miR_444   | 23.4 | 17.5 | 14.5 | 13.5 | 1.31  | 1.36  | 0.38878 | NA      | 0.81606 | NA      | 0.457 | NA    |
| ambi_miR_4482  | 11.8 | 3.65 | 3.33 | 4.17 | NA    | NA    | NA      | NA      | NA      | NA      | NA    | NA    |
| ambi_miR_4517  | 17.2 | 28.9 | 20.2 | 15.9 | -2.24 | 1.20  | 0.07624 | NA      | 0.53269 | NA      | 0.405 | NA    |
| ambi_miR_4622  | 9.76 | 9.24 | 4.76 | 5.67 | NA    | NA    | NA      | NA      | NA      | NA      | NA    | NA    |
| ambi_miR_4629  | 26.3 | 25   | 28.6 | 25   | -1.03 | 1.09  | 0.45763 | 0.96516 | 0.84119 | 0.98342 | 0.433 | 0.297 |
| ambi_miR_48    | 21.9 | 33.9 | 14.3 | 12.4 | -1.25 | 1.19  | 0.10565 | NA      | 0.57529 | NA      | 0.529 | NA    |
| ambi_miR_4944  | 6.49 | 3.78 | 6.35 | 3.59 | NA    | NA    | NA      | NA      | NA      | NA      | NA    | NA    |
| ambi_miR_4983  | 46.3 | 41.3 | 36.9 | 37.7 | 1.25  | -1.02 | 0.85058 | 0.58211 | 0.97359 | 0.84782 | 0.270 | 0.263 |
| ambi_miR_5     | 11.1 | 2.88 | 6.15 | 3.52 | NA    | NA    | NA      | NA      | NA      | NA      | NA    | NA    |
| ambi_miR_5021  | 7.21 | 5    | 4.16 | 3.44 | NA    | NA    | NA      | NA      | NA      | NA      | NA    | NA    |
| ambi_miR_5074  | 39.9 | 49.3 | 29.3 | 24.4 | -1.18 | 1.25  | 0.95893 | 0.17893 | 0.99699 | 0.60917 | 0.273 | 0.302 |
| ambi_miR_562   | 55.3 | 52   | 27.4 | 30.7 | -1.06 | -1.27 | 0.66825 | 0.38055 | 0.91760 | 0.71304 | 0.271 | 0.303 |
| ambi_miR_5723  | 6.55 | 5.31 | 6.16 | 4.47 | NA    | 7.39  | NA      | NA      | NA      | NA      | NA    | NA    |
| ambi_miR_5856  | 5.74 | 8.19 | 8    | 9.3  | NA    | 1.83  | NA      | NA      | NA      | NA      | NA    | NA    |
| ambi_miR_5893  | 9.57 | 9.83 | 7.5  | 6.15 | -2.28 | NA    | NA      | NA      | NA      | NA      | NA    | NA    |
| ambi_miR_6058  | 10.2 | 5.59 | 5.37 | 5.5  | NA    | NA    | NA      | NA      | NA      | NA      | NA    | NA    |
| ambi_miR_6117  | 35   | 25.6 | 22.6 | 17.4 | 1.26  | 1.35  | 0.26716 | 0.22310 | 0.76980 | 0.61003 | 0.375 | 0.445 |

|                 |      |      |      |      |       |       |         |         |         |         |       |       |
|-----------------|------|------|------|------|-------|-------|---------|---------|---------|---------|-------|-------|
| ambi_miR_6374   | 14.9 | 12.9 | 12.4 | 4.39 | -1.33 | NA    | NA      | NA      | NA      | NA      | NA    | NA    |
| ambi_miR_6775   | 17.6 | 18.8 | 14.2 | 12.9 | -1.05 | 1.07  | 0.96939 | NA      | 0.99699 | NA      | 0.428 | NA    |
| ambi_miR_685    | 24.7 | 17.1 | 14   | 14.7 | 1.24  | 1.02  | NA      | NA      | NA      | NA      | NA    | NA    |
| ambi_miR_693    | 41.6 | 40   | 42.2 | 30.4 | -1.08 | 1.33  | 0.22520 | 0.22471 | 0.73237 | 0.61008 | 0.278 | 0.259 |
| ambi_miR_7026   | 7.29 | 5.71 | 2.58 | 4.29 | NA    | NA    | NA      | NA      | NA      | NA      | NA    | NA    |
| ambi_miR_7027   | 18.6 | 12.3 | 7.02 | 4.83 | NA    | NA    | NA      | NA      | NA      | NA      | NA    | NA    |
| ambi_miR_7029   | 4655 | 5094 | 91.7 | 149  | -1.01 | -1.66 | 0.46616 | 0.00225 | 0.84551 | 0.07221 | 0.292 | 0.214 |
| ambi_miR_7036   | 30.3 | 30.3 | 12.4 | 17.7 | 1.14  | -1.12 | 0.60547 | NA      | 0.90548 | NA      | 0.350 | NA    |
| ambi_miR_7038_1 | 10.1 | 5.03 | 3.6  | 3.97 | NA    | NA    | NA      | NA      | NA      | NA      | NA    | NA    |
| ambi_miR_7039   | 8.95 | 4.83 | 3.32 | 3.96 | NA    | NA    | NA      | NA      | NA      | NA      | NA    | NA    |
| ambi_miR_7054   | 4.1  | 4.21 | 2.92 | 3.86 | NA    | NA    | NA      | NA      | NA      | NA      | NA    | NA    |
| ambi_miR_7055   | 11.1 | 7.67 | 6.86 | 5.92 | NA    | NA    | NA      | NA      | NA      | NA      | NA    | NA    |
| ambi_miR_7058   | 129  | 162  | 93.6 | 84.8 | -1.05 | 1.13  | 0.11101 | 0.09258 | 0.58566 | 0.52267 | 0.224 | 0.216 |
| ambi_miR_7059_1 | 10.5 | 9.03 | 5.19 | 5.79 | NA    | NA    | NA      | NA      | NA      | NA      | NA    | NA    |
| ambi_miR_7062   | 26.1 | 17.4 | 11.6 | 12   | 1.77  | 1.23  | 0.94309 | NA      | 0.99060 | NA      | 0.431 | NA    |
| ambi_miR_7067   | 10.2 | 4.34 | 3.56 | 6.53 | NA    | NA    | NA      | NA      | NA      | NA      | NA    | NA    |
| ambi_miR_7068_1 | 8.06 | 5.54 | 5.22 | 5.37 | NA    | NA    | NA      | NA      | NA      | NA      | NA    | NA    |
| ambi_miR_7070   | 8.19 | 11.1 | 4.62 | 3.71 | NA    | NA    | NA      | NA      | NA      | NA      | NA    | NA    |
| ambi_miR_7074   | 8.38 | 5.21 | 7.71 | 4.31 | NA    | NA    | NA      | NA      | NA      | NA      | NA    | NA    |
| ambi_miR_7075   | 91.2 | 84.6 | 37.9 | 49.3 | 1.05  | -1.27 | 0.99388 | 0.04783 | 0.99702 | 0.40188 | 0.255 | 0.248 |
| ambi_miR_7080   | 25   | 20.8 | 6.99 | 7.95 | NA    | NA    | NA      | NA      | NA      | NA      | NA    | NA    |
| ambi_miR_7081   | 64.7 | 59.7 | 21.9 | 54.4 | 1.11  | -2.17 | 0.36409 | 0.00206 | 0.81606 | 0.07221 | 0.279 | 0.245 |
| ambi_miR_7083   | 55.5 | 53.6 | 24.5 | 29.3 | -1.07 | -1.32 | 0.32702 | 0.80372 | 0.80818 | 0.92015 | 0.311 | 0.508 |
| ambi_miR_7084   | 6.41 | 6.6  | 3.88 | 6.6  | NA    | NA    | NA      | NA      | NA      | NA      | NA    | NA    |
| ambi_miR_7085   | 116  | 105  | 44.9 | 59.2 | 1.05  | -1.33 | 0.77260 | 0.18038 | 0.95495 | 0.60917 | 0.267 | 0.241 |
| ambi_miR_7086   | 10.3 | 9.35 | 4.52 | 4.09 | -1.27 | NA    | 0.52577 | NA      | 0.86468 | NA      | 0.519 | NA    |
| ambi_miR_7089   | 64.3 | 74.6 | 67.2 | 48.2 | -1.20 | 1.37  | 0.44170 | 0.03825 | 0.83800 | 0.36643 | 0.278 | 0.230 |
| ambi_miR_7095   | 6.48 | 2.6  | 4.85 | 4.25 | NA    | NA    | NA      | NA      | NA      | NA      | NA    | NA    |
| ambi_miR_7097   | 12.8 | 7    | 4.21 | 5.27 | -1.56 | NA    | NA      | NA      | NA      | NA      | NA    | NA    |
| ambi_miR_7098   | 5.78 | 3.8  | 4.97 | 3.93 | 2.19  | NA    | NA      | NA      | NA      | NA      | NA    | NA    |
| ambi_miR_7100   | 22.2 | 16   | 5.59 | 7.07 | 1.60  | NA    | NA      | NA      | NA      | NA      | NA    | NA    |
| ambi_miR_7101   | 9.6  | 9.69 | 3.14 | 5.01 | NA    | NA    | NA      | NA      | NA      | NA      | NA    | NA    |
| ambi_miR_7103   | 22.7 | 29.9 | 14.1 | 10.9 | -1.59 | 1.08  | 0.24734 | 0.79779 | 0.74991 | 0.92015 | 0.437 | 0.959 |
| ambi_miR_7105   | 65.6 | 75   | 39.8 | 54.5 | 1.08  | -1.17 | 0.09408 | 0.75576 | 0.55387 | 0.90302 | 0.288 | 0.222 |
| ambi_miR_7317   | 23.4 | 37.7 | 9.68 | 13.8 | -1.90 | 1.39  | 0.05463 | NA      | 0.49151 | NA      | 0.355 | NA    |
| ambi_miR_7425   | 92.8 | 164  | 73.3 | 64.9 | -1.77 | 1.19  | 0.00400 | 0.79027 | 0.15403 | 0.91985 | 0.255 | 0.219 |
| ambi_miR_7510   | 7.78 | 10.7 | 8.32 | 7.9  | -2.15 | NA    | NA      | NA      | NA      | NA      | NA    | NA    |
| ambi_miR_7912   | 10.9 | 5.43 | 2.98 | 4.38 | NA    | NA    | NA      | NA      | NA      | NA      | NA    | NA    |
| ambi_miR_7920   | 7.94 | 4.22 | 4.91 | 4.49 | -1.74 | NA    | NA      | NA      | NA      | NA      | NA    | NA    |
| ambi_miR_801    | 12.9 | 13.9 | 6.85 | 6.2  | NA    | 3.05  | NA      | NA      | NA      | NA      | NA    | NA    |
| ambi_miR_8027   | 20.5 | 23.4 | 22.3 | 19.5 | -1.31 | 1.02  | 0.53859 | 0.86094 | 0.86694 | 0.94121 | 0.420 | 0.412 |
| ambi_miR_8370   | 8.56 | 6.43 | 5.87 | 6.28 | NA    | NA    | NA      | NA      | NA      | NA      | NA    | NA    |
| ambi_miR_8396   | 21.1 | 5.61 | 9.94 | 4.65 | NA    | 1.82  | NA      | NA      | NA      | NA      | NA    | NA    |
| ambi_miR_8488   | 388  | 540  | 434  | 240  | -1.38 | 1.96  | 0.07740 | 0.00046 | 0.53269 | 0.03066 | 0.293 | 0.224 |
| ambi_miR_8518   | 33.2 | 55.9 | 21.2 | 30.5 | -1.61 | -1.38 | 0.00243 | 0.61495 | 0.11898 | 0.86289 | 0.312 | 0.337 |
| ambi_miR_8656   | 39.4 | 40.4 | 56.5 | 41.9 | 1.10  | 1.82  | 0.43401 | 0.00378 | 0.83423 | 0.09839 | 0.274 | 0.238 |
| ambi_miR_8684   | 22.9 | 27   | 23.5 | 21.3 | -1.28 | 1.15  | 0.82901 | 0.62600 | 0.97088 | 0.86330 | 0.419 | 0.362 |
| ambi_miR_8819   | 42.3 | 47.8 | 27.8 | 25.4 | -1.05 | 1.14  | 0.84237 | 0.47350 | 0.97165 | 0.78207 | 0.298 | 0.373 |
| ambi_miR_8870   | 7.77 | 6.9  | 7.1  | 6.85 | NA    | NA    | NA      | NA      | NA      | NA      | NA    | NA    |
| ambi_miR_9125   | 54.7 | 68.4 | 47.6 | 39.8 | -1.31 | 1.22  | 0.08691 | 0.05186 | 0.53791 | 0.40990 | 0.294 | 0.226 |

|                |      |      |      |      |       |       |         |         |         |         |       |       |
|----------------|------|------|------|------|-------|-------|---------|---------|---------|---------|-------|-------|
| ambi_miR_9134  | 8.59 | 5.88 | 3.24 | 4.62 | NA    | NA    | NA      | NA      | NA      | NA      | NA    | NA    |
| ambi_miR_917   | 8.97 | 6.09 | 3.53 | 4.49 | NA    | NA    | NA      | NA      | NA      | NA      | NA    | NA    |
| ambi_miR_9451  | 161  | 232  | 99.9 | 92.1 | -1.48 | 1.16  | 0.06211 | 0.25006 | 0.51104 | 0.63100 | 0.280 | 0.200 |
| ambi_miR_9508  | 70.8 | 96.5 | 61.4 | 46.5 | -1.34 | 1.41  | 0.10020 | 0.03523 | 0.56901 | 0.35468 | 0.308 | 0.221 |
| ambi_miR_9534  | 24.3 | 23.4 | 23.5 | 17.9 | 1.11  | 1.70  | 0.84348 | 0.00340 | 0.97165 | 0.09324 | 0.483 | 0.407 |
| ambi_miR_9565  | 14.8 | 3.51 | 5.32 | 4.12 | NA    | NA    | NA      | NA      | NA      | NA      | NA    | NA    |
| ambi_miR_9630  | 14.8 | 8.99 | 6.06 | 4.84 | NA    | NA    | NA      | NA      | NA      | NA      | NA    | NA    |
| ambi_miR_9638  | 22.3 | 28.1 | 28.3 | 21.6 | -1.31 | 1.34  | 0.01609 | 0.25153 | 0.30814 | 0.63100 | 0.393 | 0.350 |
| ambi_miR_9651  | 101  | 32.6 | 33   | 20.8 | 2.72  | 1.43  | 0.00622 | 0.02766 | 0.05204 | 0.33710 | 0.312 | 0.290 |
| ambi_miR_9873  | 20.7 | 35.8 | 12.6 | 15.3 | -2.02 | -1.28 | 0.04592 | 0.92752 | 0.45703 | 0.96689 | 0.396 | 0.617 |
| ambi_miR_9881  | 11.2 | 5.08 | 6.55 | 6.68 | NA    | -1.49 | NA      | NA      | NA      | NA      | NA    | NA    |
| hsa_let_7a     | #### | #### | 8222 | 9875 | -1.39 | -1.11 | 0.27895 | 0.31330 | 0.77801 | 0.66752 | 0.355 | 0.139 |
| hsa_let_7b     | #### | #### | #### | #### | -1.68 | 1.06  | 0.39769 | 0.83808 | 0.81772 | 0.93326 | 0.561 | 0.131 |
| hsa_let_7c     | #### | #### | #### | #### | -1.19 | -1.05 | 0.94051 | 0.56728 | 0.98952 | 0.84419 | 0.370 | 0.131 |
| hsa_let_7d     | #### | #### | 9401 | 9121 | -1.09 | 1.09  | 0.71791 | 0.25370 | 0.93193 | 0.63100 | 0.378 | 0.135 |
| hsa_let_7e     | 2025 | 2512 | 976  | 1166 | -1.09 | -1.07 | 0.77783 | 0.13798 | 0.95626 | 0.57286 | 0.277 | 0.135 |
| hsa_let_7f     | 8764 | #### | 3372 | 4188 | -1.05 | -1.09 | 0.50263 | 0.41224 | 0.85276 | 0.73868 | 0.314 | 0.141 |
| hsa_let_7g     | 6887 | 8906 | 3667 | 3884 | -1.18 | -1.02 | 0.53771 | 0.47909 | 0.86687 | 0.78682 | 0.346 | 0.141 |
| hsa_let_7i     | 6962 | 8456 | 3431 | 3989 | -1.12 | -1.05 | 0.93268 | 0.13137 | 0.98453 | 0.57286 | 0.312 | 0.148 |
| hsa_miR_1      | #### | #### | 7818 | 9346 | -1.11 | -1.11 | 0.89105 | 0.30233 | 0.98217 | 0.65702 | 0.329 | 0.135 |
| hsa_miR_100    | 3504 | 3030 | 1445 | 1418 | 1.09  | -1.04 | 0.73710 | 0.57614 | 0.94049 | 0.84782 | 0.273 | 0.137 |
| hsa_miR_101    | 131  | 124  | 42.5 | 55.5 | 1.05  | -1.33 | 0.30480 | 0.00563 | 0.80227 | 0.13062 | 0.220 | 0.220 |
| hsa_miR_103    | 3510 | 2856 | 1265 | 1280 | 1.09  | -1.12 | 0.54053 | 0.25973 | 0.86694 | 0.63284 | 0.307 | 0.137 |
| hsa_miR_105    | 5.39 | 1.92 | 5.93 | 5.05 | NA    | 2.12  | NA      | NA      | NA      | NA      | NA    | NA    |
| hsa_miR_106a   | 761  | 716  | 206  | 295  | 1.28  | -1.25 | 0.01081 | 0.08240 | 0.27507 | 0.50095 | 0.252 | 0.175 |
| hsa_miR_106b   | 392  | 603  | 185  | 228  | -1.24 | -1.12 | 0.30329 | 0.24468 | 0.80227 | 0.63100 | 0.259 | 0.271 |
| hsa_miR_107    | 3480 | 2872 | 1305 | 1344 | 1.08  | -1.15 | 0.81373 | 0.05027 | 0.96748 | 0.40727 | 0.280 | 0.137 |
| hsa_miR_10a    | 797  | 911  | 316  | 369  | -1.06 | -1.03 | 0.40486 | 0.63301 | 0.81772 | 0.86330 | 0.240 | 0.170 |
| hsa_miR_10b    | 180  | 228  | 98.1 | 104  | -1.21 | 1.07  | 0.44705 | 0.31543 | 0.83800 | 0.66779 | 0.236 | 0.204 |
| hsa_miR_122a   | 39.1 | 64.2 | 28.3 | 32.4 | -1.53 | -1.08 | 0.06078 | 0.59671 | 0.50859 | 0.85412 | 0.270 | 0.267 |
| hsa_miR_124a   | 17   | 18.4 | 4.62 | 4.66 | 1.02  | NA    | NA      | NA      | NA      | NA      | NA    | NA    |
| hsa_miR_125a   | 2229 | 2094 | 1043 | 920  | -1.06 | 1.04  | 0.85822 | 0.69834 | 0.97422 | 0.88138 | 0.277 | 0.142 |
| hsa_miR_125b   | #### | #### | 4904 | 4270 | 1.05  | 1.02  | 0.94945 | 0.88708 | 0.99481 | 0.95511 | 0.318 | 0.137 |
| hsa_miR_126    | #### | #### | #### | #### | -1.02 | 1.26  | 0.34389 | 0.00484 | 0.81142 | 0.11748 | 0.350 | 0.142 |
| hsa_miR_126_AS | 1429 | 1520 | 476  | 471  | 1.01  | 1.12  | 0.81447 | 0.01168 | 0.96748 | 0.20777 | 0.268 | 0.148 |
| hsa_miR_127    | 26.5 | 31   | 11.9 | 13.9 | -1.15 | -1.01 | 0.18802 | 0.71935 | 0.67910 | 0.89010 | 0.423 | 0.602 |
| hsa_miR_128a   | 768  | 577  | 226  | 255  | 1.21  | -1.16 | 0.35737 | 0.49655 | 0.81606 | 0.79681 | 0.259 | 0.179 |
| hsa_miR_128b   | 704  | 557  | 216  | 231  | 1.14  | -1.15 | 0.50616 | 0.21845 | 0.85276 | 0.61003 | 0.277 | 0.183 |
| hsa_miR_129    | 25.1 | 34.5 | 6.58 | 8.32 | -2.04 | NA    | NA      | NA      | NA      | NA      | NA    | NA    |
| hsa_miR_130a   | 2489 | 3258 | 1175 | 1396 | -1.28 | -1.11 | 0.17986 | 0.30011 | 0.66751 | 0.65702 | 0.302 | 0.166 |
| hsa_miR_130b   | 101  | 144  | 37   | 59   | -1.24 | -1.48 | 0.24322 | 0.25477 | 0.74910 | 0.63128 | 0.223 | 0.240 |
| hsa_miR_132    | 370  | 272  | 168  | 124  | 1.25  | 1.25  | 0.36424 | 0.24761 | 0.81606 | 0.63100 | 0.282 | 0.216 |
| hsa_miR_133a   | #### | #### | 9408 | 9545 | -1.07 | 1.03  | 0.41133 | 0.64062 | 0.81772 | 0.86497 | 0.325 | 0.141 |
| hsa_miR_133b   | #### | #### | 9276 | 8625 | -1.12 | 1.04  | 0.81269 | 0.23145 | 0.96748 | 0.61740 | 0.391 | 0.145 |
| hsa_miR_134    | 30.6 | 40.1 | 17.9 | 18.7 | -1.18 | -1.02 | 0.49528 | 0.83904 | 0.85276 | 0.93326 | 0.277 | 0.296 |
| hsa_miR_135a   | 4.68 | 5.99 | 3.28 | 6.34 | NA    | NA    | NA      | NA      | NA      | NA      | NA    | NA    |
| hsa_miR_135b   | 8.36 | 3.54 | 5.28 | 4.95 | NA    | NA    | NA      | NA      | NA      | NA      | NA    | NA    |
| hsa_miR_136    | 22.7 | 17.4 | 17.4 | 20.6 | 1.36  | -1.09 | 0.49350 | 0.98189 | 0.85276 | 0.98838 | 0.482 | 0.408 |
| hsa_miR_137    | 11.2 | 11.7 | 7.21 | 7.11 | -3.82 | -2.26 | NA      | NA      | NA      | NA      | NA    | NA    |
| hsa_miR_138    | 70.5 | 61.1 | 28.8 | 30.1 | 1.14  | -1.11 | 0.75207 | 0.79498 | 0.94768 | 0.92015 | 0.276 | 0.308 |

|                |       |       |      |      |       |       |         |         |         |         |       |       |
|----------------|-------|-------|------|------|-------|-------|---------|---------|---------|---------|-------|-------|
| hsa_miR_139    | 499   | 378   | 184  | 176  | 1.19  | 1.01  | 0.32063 | 0.66136 | 0.80283 | 0.87126 | 0.254 | 0.201 |
| hsa_miR_140    | 198   | 175   | 77.9 | 106  | 1.21  | -1.35 | 0.81397 | 0.13371 | 0.96748 | 0.57286 | 0.291 | 0.197 |
| hsa_miR_141    | 21.2  | 14.5  | 6.71 | 3.06 | -1.08 | NA    | 0.68376 | NA      | 0.92294 | NA      | 0.406 | NA    |
| hsa_miR_142_3p | 24.3  | 33.7  | 11.1 | 14   | -1.15 | 1.20  | 0.76902 | NA      | 0.95185 | NA      | 0.466 | NA    |
| hsa_miR_142_5p | 82.4  | 74    | 30.3 | 35.8 | -1.07 | -1.18 | 0.38779 | 0.23934 | 0.81606 | 0.62947 | 0.243 | 0.254 |
| hsa_miR_143    | 3983  | 6546  | 3043 | 3126 | -1.40 | 1.14  | 0.15167 | 0.03325 | 0.63882 | 0.34591 | 0.284 | 0.150 |
| hsa_miR_144    | 13.4  | 11.1  | 13.1 | 6.65 | NA    | 1.34  | NA      | NA      | NA      | NA      | NA    | NA    |
| hsa_miR_145    | ##### | ##### | 6227 | 6054 | 1.17  | -1.00 | 0.69874 | 0.50027 | 0.92294 | 0.79777 | 0.325 | 0.137 |
| hsa_miR_146a   | 907   | 1198  | 483  | 502  | -1.16 | 1.05  | 0.33888 | 0.27245 | 0.80962 | 0.63334 | 0.342 | 0.152 |
| hsa_miR_146b   | 353   | 135   | 55.6 | 72.2 | 2.64  | -1.21 | 0.00032 | 0.18258 | 0.04274 | 0.60917 | 0.238 | 0.226 |
| hsa_miR_147    | 7.93  | 4.51  | 4.74 | 7.23 | NA    | NA    | NA      | NA      | NA      | NA      | NA    | NA    |
| hsa_miR_148a   | 1348  | 1087  | 469  | 481  | 1.14  | -1.09 | 0.82811 | 0.17130 | 0.97088 | 0.60917 | 0.342 | 0.141 |
| hsa_miR_148b   | 105   | 86.2  | 46.6 | 46.7 | 1.08  | -1.11 | 0.43025 | 0.53277 | 0.83254 | 0.81662 | 0.245 | 0.226 |
| hsa_miR_149    | 864   | 724   | 359  | 335  | 1.13  | 1.01  | 0.54762 | 0.75198 | 0.87307 | 0.90115 | 0.239 | 0.152 |
| hsa_miR_150    | 1104  | 901   | 419  | 365  | 1.12  | 1.05  | 0.42957 | 0.64140 | 0.83254 | 0.86497 | 0.243 | 0.148 |
| hsa_miR_151    | 63    | 64.5  | 34.8 | 39.9 | -1.01 | -1.19 | 0.60511 | 0.77156 | 0.90548 | 0.91169 | 0.309 | 0.251 |
| hsa_miR_152    | 1293  | 992   | 486  | 463  | 1.17  | -1.03 | 0.38241 | 0.99269 | 0.81606 | 0.99533 | 0.282 | 0.139 |
| hsa_miR_153    | 22.9  | 17.6  | 6.75 | 10.9 | 1.15  | NA    | NA      | NA      | NA      | NA      | NA    | NA    |
| hsa_miR_154    | 36.1  | 37.2  | 19.2 | 20.3 | 1.11  | -1.00 | 0.83047 | NA      | 0.97088 | NA      | 0.280 | NA    |
| hsa_miR_154_AS | 9.89  | 3.82  | 8.77 | 4.39 | NA    | NA    | NA      | NA      | NA      | NA      | NA    | NA    |
| hsa_miR_155    | 91.4  | 68.8  | 31.6 | 43.4 | 1.68  | -1.27 | 0.19748 | 0.16842 | 0.69449 | 0.60781 | 0.424 | 0.250 |
| hsa_miR_15a    | 1360  | 1550  | 554  | 621  | -1.09 | -1.02 | 0.31081 | 0.58515 | 0.80227 | 0.84782 | 0.251 | 0.137 |
| hsa_miR_15b    | 1280  | 941   | 393  | 365  | 1.20  | 1.01  | 0.38757 | 0.84443 | 0.81606 | 0.93359 | 0.260 | 0.151 |
| hsa_miR_16     | ##### | ##### | 6715 | 6535 | 1.15  | 1.04  | 0.92037 | 0.46556 | 0.98314 | 0.77860 | 0.324 | 0.144 |
| hsa_miR_17_3p  | 55.9  | 44.8  | 16   | 24.6 | 1.35  | -1.61 | 0.52751 | 0.12342 | 0.86468 | 0.56533 | 0.275 | 0.300 |
| hsa_miR_17_5p  | 451   | 402   | 137  | 165  | 1.20  | -1.11 | 0.99865 | 0.38728 | 0.99865 | 0.71865 | 0.242 | 0.222 |
| hsa_miR_181a   | 3119  | 4036  | 1706 | 1626 | -1.28 | 1.05  | 0.39654 | 0.64342 | 0.81772 | 0.86574 | 0.276 | 0.159 |
| hsa_miR_181b   | 777   | 852   | 469  | 467  | -1.15 | -1.08 | 0.37865 | 0.30124 | 0.81606 | 0.65702 | 0.239 | 0.143 |
| hsa_miR_181c   | 297   | 318   | 116  | 145  | -1.04 | -1.18 | 0.79618 | 0.40041 | 0.96452 | 0.72853 | 0.238 | 0.207 |
| hsa_miR_181d   | 303   | 367   | 166  | 184  | -1.10 | -1.12 | 0.89813 | 0.29633 | 0.98314 | 0.65691 | 0.255 | 0.199 |
| hsa_miR_182    | 13.7  | 12.2  | 5.65 | 11.2 | -1.08 | 1.72  | NA      | NA      | NA      | NA      | NA    | NA    |
| hsa_miR_182_AS | 8.82  | 6.1   | 8.63 | 3.91 | NA    | NA    | NA      | NA      | NA      | NA      | NA    | NA    |
| hsa_miR_183    | 5.25  | 10.5  | 3.37 | 7.44 | NA    | NA    | NA      | NA      | NA      | NA      | NA    | NA    |
| hsa_miR_184    | 25.5  | 35.2  | 9.65 | 16.7 | -1.32 | 1.02  | 0.80913 | 0.40502 | 0.96748 | 0.73247 | 0.421 | 0.617 |
| hsa_miR_185    | 1670  | 2307  | 878  | 970  | -1.23 | -1.04 | 0.62192 | 0.25715 | 0.91139 | 0.63280 | 0.264 | 0.140 |
| hsa_miR_186    | 67.2  | 69.3  | 18.6 | 38.8 | 1.10  | -1.79 | 0.91553 | 0.07102 | 0.98314 | 0.48329 | 0.268 | 0.263 |
| hsa_miR_187    | 100   | 103   | 69.1 | 61.8 | -1.05 | 1.08  | 0.21436 | 0.97183 | 0.71191 | 0.98569 | 0.303 | 0.244 |
| hsa_miR_188    | 57.2  | 64.2  | 23.1 | 26.2 | -1.32 | -1.19 | 0.06596 | 0.62200 | 0.51758 | 0.86330 | 0.287 | 0.329 |
| hsa_miR_189    | 212   | 197   | 68.7 | 84.1 | 1.03  | -1.23 | 0.71886 | 0.14221 | 0.93211 | 0.57499 | 0.233 | 0.243 |
| hsa_miR_18a    | 88.4  | 73.4  | 24.6 | 29.8 | 1.30  | -1.21 | 0.86059 | 0.66243 | 0.97422 | 0.87126 | 0.384 | 0.346 |
| hsa_miR_18a_AS | 22.2  | 14.6  | 7.78 | 7.27 | 1.32  | NA    | NA      | NA      | NA      | NA      | NA    | NA    |
| hsa_miR_18b    | 35.3  | 30.6  | 9.66 | 14.5 | 1.35  | -1.04 | 0.06495 | NA      | 0.51758 | NA      | 0.313 | NA    |
| hsa_miR_190    | 11.2  | 6.12  | 2.14 | 5.6  | NA    | NA    | NA      | NA      | NA      | NA      | NA    | NA    |
| hsa_miR_191    | 5772  | 4262  | 2045 | 1798 | 1.22  | 1.03  | 0.36493 | 0.85920 | 0.81606 | 0.94080 | 0.300 | 0.139 |
| hsa_miR_191_AS | 14.7  | 16.9  | 14.6 | 15.9 | -1.17 | -1.33 | NA      | 0.47862 | NA      | 0.78682 | NA    | 0.648 |
| hsa_miR_192    | 197   | 170   | 95.7 | 93   | 1.12  | -1.01 | 0.34756 | 0.93287 | 0.81142 | 0.96704 | 0.233 | 0.196 |
| hsa_miR_193a   | 14.7  | 14.5  | 4.41 | 5.95 | NA    | NA    | NA      | NA      | NA      | NA      | NA    | NA    |
| hsa_miR_193b   | 78.7  | 62.8  | 34.4 | 36.2 | 1.23  | -1.08 | 0.22264 | 0.79228 | 0.72801 | 0.92015 | 0.283 | 0.237 |
| hsa_miR_194    | 340   | 312   | 186  | 161  | -1.01 | 1.09  | 0.91170 | 0.39300 | 0.98314 | 0.72050 | 0.244 | 0.202 |
| hsa_miR_195    | 3698  | 3118  | 1629 | 1475 | 1.16  | 1.05  | 0.44157 | 0.84279 | 0.83800 | 0.93359 | 0.285 | 0.137 |



|                 |      |      |      |      |       |       |         |         |         |         |       |       |
|-----------------|------|------|------|------|-------|-------|---------|---------|---------|---------|-------|-------|
| hsa_miR_196a    | 6.52 | 1.56 | 3.82 | 2.65 | NA    | NA    | NA      | NA      | NA      | NA      | NA    | NA    |
| hsa_miR_196b    | 12.2 | 4.2  | 6.55 | 4.7  | NA    | NA    | NA      | NA      | NA      | NA      | NA    | NA    |
| hsa_miR_197     | 24.2 | 20.4 | 24.3 | 19   | 1.07  | 1.41  | 0.31848 | 0.45433 | 0.80283 | 0.77514 | 0.394 | 0.471 |
| hsa_miR_198     | 75   | 122  | 51.7 | 50   | -1.60 | 1.11  | 0.01197 | 0.58618 | 0.28186 | 0.84782 | 0.248 | 0.242 |
| hsa_miR_199a    | 1765 | 1533 | 662  | 689  | 1.01  | -1.07 | 0.92847 | 0.84600 | 0.98314 | 0.93359 | 0.250 | 0.139 |
| hsa_miR_199a_AS | 3964 | 3414 | 1559 | 1693 | 1.09  | -1.09 | 0.69271 | 0.26761 | 0.92294 | 0.63334 | 0.285 | 0.137 |
| hsa_miR_199b    | 81.4 | 73.1 | 22.4 | 35.5 | 1.11  | -1.40 | 0.91836 | 0.29353 | 0.98314 | 0.65684 | 0.266 | 0.364 |
| hsa_miR_19a     | 56.5 | 60.4 | 19.8 | 22.5 | 1.04  | -1.15 | 0.66466 | NA      | 0.91760 | NA      | 0.310 | NA    |
| hsa_miR_19b     | 774  | 751  | 285  | 273  | 1.01  | 1.06  | 0.73744 | 0.46336 | 0.94049 | 0.77855 | 0.242 | 0.156 |
| hsa_miR_200a    | 7.34 | 7.68 | 5.05 | 3.22 | -1.53 | NA    | NA      | NA      | NA      | NA      | NA    | NA    |
| hsa_miR_200a_AS | 7.45 | 5.59 | 7.11 | 3.91 | NA    | NA    | NA      | NA      | NA      | NA      | NA    | NA    |
| hsa_miR_200b    | 10.7 | 13.6 | 5.66 | 7.7  | -1.32 | NA    | NA      | NA      | NA      | NA      | NA    | NA    |
| hsa_miR_200c    | 68.5 | 64.7 | 27.3 | 31.1 | 1.04  | -1.14 | 0.46195 | 0.14366 | 0.84546 | 0.57845 | 0.288 | 0.270 |
| hsa_miR_202     | 68.2 | 131  | 52.4 | 57.1 | -1.81 | 1.04  | 0.00396 | 0.70260 | 0.15403 | 0.88138 | 0.235 | 0.238 |
| hsa_miR_202_AS  | 5.62 | 4.76 | 3.01 | 7.09 | NA    | NA    | NA      | NA      | NA      | NA      | NA    | NA    |
| hsa_miR_203     | 151  | 144  | 70.7 | 81.7 | 1.05  | -1.11 | 0.91220 | 0.19110 | 0.98314 | 0.60917 | 0.228 | 0.209 |
| hsa_miR_204     | 220  | 202  | 90.8 | 107  | 1.08  | -1.22 | 0.71181 | 0.12769 | 0.92738 | 0.56533 | 0.271 | 0.204 |
| hsa_miR_205     | 9.42 | 5.7  | 3.75 | 7.41 | NA    | NA    | NA      | NA      | NA      | NA      | NA    | NA    |
| hsa_miR_206     | 100  | 105  | 18.9 | 36.4 | 1.10  | -1.50 | 0.07701 | 0.30654 | 0.53269 | 0.65995 | 0.223 | 0.428 |
| hsa_miR_208     | 78.1 | 99.9 | 27.2 | 41.4 | -1.18 | -1.47 | 0.06227 | 0.00987 | 0.51104 | 0.18477 | 0.261 | 0.271 |
| hsa_miR_20a     | 163  | 188  | 45.7 | 70.1 | 1.08  | -1.20 | 0.33633 | 0.09979 | 0.80962 | 0.52482 | 0.243 | 0.228 |
| hsa_miR_20b     | 158  | 129  | 45.2 | 65.3 | 1.36  | -1.32 | 0.38034 | 0.13522 | 0.81606 | 0.57286 | 0.249 | 0.233 |
| hsa_miR_21      | 6436 | 2541 | 1303 | 1271 | 2.54  | 1.02  | 0.00099 | 0.95338 | 0.04137 | 0.97625 | 0.273 | 0.169 |
| hsa_miR_210     | 254  | 205  | 102  | 107  | 1.17  | -1.09 | 0.55170 | 0.78591 | 0.87307 | 0.91847 | 0.236 | 0.200 |
| hsa_miR_211     | 5.36 | 4.02 | 7.8  | 4.56 | NA    | NA    | NA      | NA      | NA      | NA      | NA    | NA    |
| hsa_miR_212     | 34.3 | 24.6 | 17.6 | 13   | 1.33  | 1.13  | 0.24249 | 0.37334 | 0.74865 | 0.70928 | 0.388 | 0.292 |
| hsa_miR_213     | 95.2 | 79   | 38.4 | 45.9 | 1.14  | -1.33 | 0.63504 | 0.30073 | 0.91450 | 0.65702 | 0.267 | 0.289 |
| hsa_miR_214     | 923  | 921  | 446  | 344  | -1.13 | 1.15  | 0.61607 | 0.11397 | 0.91139 | 0.54560 | 0.242 | 0.157 |
| hsa_miR_215     | 5.02 | 7    | 5.06 | 5.39 | NA    | NA    | NA      | NA      | NA      | NA      | NA    | NA    |
| hsa_miR_216     | 13.8 | 9.23 | 6.28 | 10.3 | -1.01 | -1.28 | NA      | NA      | NA      | NA      | NA    | NA    |
| hsa_miR_217     | 4.99 | 5.6  | 4.16 | 4.17 | NA    | NA    | NA      | NA      | NA      | NA      | NA    | NA    |
| hsa_miR_218     | 85.9 | 74.3 | 33.6 | 42.7 | 1.20  | -1.29 | 0.89614 | 0.34338 | 0.98314 | 0.69130 | 0.313 | 0.233 |
| hsa_miR_219     | 14.3 | 6.03 | 5.71 | 3.37 | NA    | NA    | NA      | NA      | NA      | NA      | NA    | NA    |
| hsa_miR_22      | #### | #### | 8485 | 8580 | -1.12 | 1.09  | 0.63428 | 0.20130 | 0.91450 | 0.60917 | 0.319 | 0.138 |
| hsa_miR_220     | 10.4 | 4.41 | 5.61 | 5.38 | NA    | NA    | NA      | NA      | NA      | NA      | NA    | NA    |
| hsa_miR_221     | 2040 | 1622 | 825  | 821  | 1.19  | -1.06 | 0.35675 | 0.49299 | 0.81606 | 0.79681 | 0.272 | 0.135 |
| hsa_miR_222     | 754  | 561  | 284  | 278  | 1.23  | -1.03 | 0.27952 | 0.58911 | 0.77801 | 0.84829 | 0.253 | 0.166 |
| hsa_miR_223     | 701  | 429  | 189  | 236  | 1.73  | -1.15 | 0.00216 | 0.15502 | 0.10966 | 0.59498 | 0.238 | 0.188 |
| hsa_miR_224     | 32.6 | 20.5 | 12.1 | 17.4 | 1.42  | -1.50 | 0.06212 | NA      | 0.51104 | NA      | 0.369 | NA    |
| hsa_miR_23a     | #### | #### | 9049 | 8512 | 1.36  | -1.05 | 0.26342 | 0.62684 | 0.76850 | 0.86330 | 0.365 | 0.137 |
| hsa_miR_23b     | #### | #### | #### | #### | 1.25  | -1.04 | 0.23390 | 0.55116 | 0.73613 | 0.83143 | 0.353 | 0.148 |
| hsa_miR_24      | #### | #### | 9166 | 8455 | 1.20  | 1.05  | 0.37812 | 0.19549 | 0.81606 | 0.60917 | 0.356 | 0.146 |
| hsa_miR_25      | 968  | 806  | 321  | 336  | 1.17  | -1.07 | 0.57761 | 0.83826 | 0.89274 | 0.93326 | 0.247 | 0.150 |
| hsa_miR_26a     | #### | #### | 7069 | 7857 | -1.22 | -1.00 | 0.19880 | 0.99974 | 0.69469 | 0.99974 | 0.318 | 0.135 |
| hsa_miR_26b     | 1522 | 1650 | 615  | 733  | 1.02  | -1.13 | 0.82974 | 0.00407 | 0.97088 | 0.10330 | 0.253 | 0.138 |
| hsa_miR_27a     | 3862 | 2885 | 1486 | 1319 | 1.18  | 1.04  | 0.51561 | 0.49045 | 0.86228 | 0.79409 | 0.274 | 0.138 |
| hsa_miR_27b     | #### | 8685 | 4166 | 4063 | 1.14  | -1.09 | 0.21751 | 0.35782 | 0.71678 | 0.70632 | 0.331 | 0.141 |
| hsa_miR_28      | 311  | 246  | 114  | 119  | 1.23  | -1.14 | 0.15019 | 0.20973 | 0.63679 | 0.61003 | 0.238 | 0.211 |
| hsa_miR_296     | 23.9 | 27.6 | 19.7 | 21.2 | -1.25 | -1.02 | 0.69861 | 0.63416 | 0.92294 | 0.86330 | 0.405 | 0.329 |
| hsa_miR_299_3p  | 17.7 | 29   | 7.13 | 11   | -2.02 | -1.37 | NA      | NA      | NA      | NA      | NA    | NA    |

|                 |      |      |      |      |       |       |         |         |         |         |       |       |
|-----------------|------|------|------|------|-------|-------|---------|---------|---------|---------|-------|-------|
| hsa_miR_299_5p  | 31.5 | 35.7 | 38.1 | 35.1 | -1.03 | 1.32  | 0.77376 | 0.19187 | 0.95495 | 0.60917 | 0.302 | 0.243 |
| hsa_miR_29a     | #### | #### | 8337 | #### | -1.12 | -1.21 | 0.59678 | 0.13491 | 0.90290 | 0.57286 | 0.334 | 0.176 |
| hsa_miR_29b     | 2000 | 2781 | 817  | 1159 | -1.23 | -1.25 | 0.31431 | 0.20130 | 0.80227 | 0.60917 | 0.321 | 0.136 |
| hsa_miR_29c     | 3170 | 3956 | 1211 | 1410 | -1.15 | -1.10 | 0.75388 | 0.81699 | 0.94768 | 0.92540 | 0.323 | 0.141 |
| hsa_miR_301     | 75.3 | 61.9 | 25.6 | 38.8 | 1.21  | -1.54 | 0.91234 | 0.02791 | 0.98314 | 0.33710 | 0.248 | 0.266 |
| hsa_miR_302a    | 4.78 | 5.52 | 8.08 | 7.43 | NA    | NA    | NA      | NA      | NA      | NA      | NA    | NA    |
| hsa_miR_302a_AS | 5.05 | 4.29 | 7.95 | 7.57 | NA    | NA    | NA      | NA      | NA      | NA      | NA    | NA    |
| hsa_miR_302b    | 8.6  | 11.6 | 3.56 | 4.09 | NA    | NA    | NA      | NA      | NA      | NA      | NA    | NA    |
| hsa_miR_302b_AS | 7.22 | 5.67 | 7.04 | 6.41 | NA    | NA    | NA      | NA      | NA      | NA      | NA    | NA    |
| hsa_miR_302c    | 6.11 | 3.74 | 4.45 | 3.45 | NA    | NA    | NA      | NA      | NA      | NA      | NA    | NA    |
| hsa_miR_302c_AS | 18.1 | 27.4 | 13.5 | 13.9 | -1.86 | 1.01  | NA      | NA      | NA      | NA      | NA    | NA    |
| hsa_miR_302d    | 4.81 | 4.76 | 5.26 | 4.69 | -1.11 | NA    | NA      | NA      | NA      | NA      | NA    | NA    |
| hsa_miR_30a_3p  | 137  | 107  | 73.2 | 76.9 | 1.22  | -1.13 | 0.77644 | 0.74365 | 0.95626 | 0.90115 | 0.238 | 0.198 |
| hsa_miR_30a_5p  | #### | #### | 5907 | 6121 | -1.17 | -1.01 | 0.21006 | 0.72134 | 0.70415 | 0.89010 | 0.326 | 0.137 |
| hsa_miR_30b     | 4789 | 3241 | 1815 | 1882 | 1.42  | -1.07 | 0.14745 | 0.35760 | 0.63364 | 0.70632 | 0.272 | 0.137 |
| hsa_miR_30c     | #### | 8594 | 4820 | 4773 | 1.25  | -1.02 | 0.49099 | 0.96082 | 0.85202 | 0.98125 | 0.316 | 0.138 |
| hsa_miR_30d     | 8924 | #### | 4924 | 4734 | -1.14 | 1.05  | 0.48956 | 0.84371 | 0.85202 | 0.93359 | 0.314 | 0.145 |
| hsa_miR_30e_3p  | 209  | 207  | 108  | 131  | 1.01  | -1.22 | 0.85149 | 0.07359 | 0.97359 | 0.48471 | 0.258 | 0.205 |
| hsa_miR_30e_5p  | #### | 9493 | 4760 | 4399 | 1.11  | 1.08  | 0.49097 | 0.06195 | 0.85202 | 0.45276 | 0.314 | 0.138 |
| hsa_miR_31      | 330  | 419  | 202  | 226  | -1.19 | -1.06 | 0.61899 | 0.70399 | 0.91139 | 0.88138 | 0.250 | 0.185 |
| hsa_miR_32      | 3.13 | 6.64 | 4.66 | 3.37 | NA    | NA    | NA      | NA      | NA      | NA      | NA    | NA    |
| hsa_miR_320     | 1039 | 1814 | 743  | 1107 | -1.84 | -1.46 | 0.00492 | 0.00375 | 0.04274 | 0.09839 | 0.256 | 0.134 |
| hsa_miR_323     | 9.74 | 4.67 | 5.31 | 5.24 | NA    | NA    | NA      | NA      | NA      | NA      | NA    | NA    |
| hsa_miR_324_3p  | 49.2 | 44.5 | 35.7 | 31   | 1.08  | 1.18  | 0.79050 | 0.63783 | 0.95854 | 0.86497 | 0.281 | 0.264 |
| hsa_miR_324_5p  | 33.1 | 41.4 | 29.7 | 24.4 | -1.27 | 1.22  | 0.80511 | 0.99046 | 0.96748 | 0.99511 | 0.329 | 0.289 |
| hsa_miR_325     | 8.78 | 11   | 2.63 | 7.19 | NA    | NA    | NA      | NA      | NA      | NA      | NA    | NA    |
| hsa_miR_326     | 23.6 | 27.3 | 29.6 | 20.4 | -1.12 | 1.57  | 0.46662 | 0.25708 | 0.84551 | 0.63280 | 0.433 | 0.319 |
| hsa_miR_328     | 36.9 | 39.9 | 28.4 | 26.5 | -1.19 | 1.02  | 0.68984 | 0.81070 | 0.92294 | 0.92150 | 0.279 | 0.283 |
| hsa_miR_329     | 7.06 | 6.14 | 4.11 | 5.55 | NA    | NA    | NA      | NA      | NA      | NA      | NA    | NA    |
| hsa_miR_33      | 16.8 | 17.9 | 13.3 | 13.7 | NA    | -1.74 | NA      | NA      | NA      | NA      | NA    | NA    |
| hsa_miR_330     | 10.3 | 6.16 | 5.64 | 5.46 | NA    | NA    | NA      | NA      | NA      | NA      | NA    | NA    |
| hsa_miR_331     | 95.3 | 101  | 36.4 | 46.1 | -1.12 | -1.37 | 0.17871 | 0.05413 | 0.66751 | 0.41678 | 0.275 | 0.230 |
| hsa_miR_335     | 209  | 205  | 61.5 | 84.3 | 1.14  | -1.22 | 0.88696 | 0.24046 | 0.97936 | 0.62947 | 0.268 | 0.246 |
| hsa_miR_337     | 22.8 | 21.6 | 9.75 | 12.9 | 1.10  | 1.12  | NA      | NA      | NA      | NA      | NA    | NA    |
| hsa_miR_338     | 23.7 | 25.6 | 8.26 | 16.8 | 1.19  | -2.20 | 0.08897 | NA      | 0.53791 | NA      | 0.419 | NA    |
| hsa_miR_339     | 118  | 92.1 | 41.8 | 47.2 | 1.27  | -1.18 | 0.08779 | 0.16942 | 0.53791 | 0.60865 | 0.238 | 0.228 |
| hsa_miR_340     | 35.4 | 27.4 | 11.6 | 10.2 | 1.29  | 1.14  | 0.34675 | NA      | 0.81142 | NA      | 0.321 | NA    |
| hsa_miR_342     | 1165 | 962  | 512  | 491  | 1.15  | 1.06  | 0.26011 | 0.30881 | 0.76411 | 0.66191 | 0.243 | 0.143 |
| hsa_miR_345     | 49.7 | 44.1 | 27.9 | 34.9 | 1.14  | -1.24 | 0.47744 | 0.32113 | 0.84660 | 0.67177 | 0.270 | 0.276 |
| hsa_miR_346     | 44.8 | 22.8 | 21   | 16.1 | 1.82  | 1.22  | 0.06554 | 0.17154 | 0.51758 | 0.60917 | 0.296 | 0.551 |
| hsa_miR_34a     | 307  | 401  | 125  | 164  | -1.18 | -1.15 | 0.19815 | 0.19827 | 0.69449 | 0.60917 | 0.238 | 0.222 |
| hsa_miR_34b     | 29.6 | 30.7 | 9.98 | 20.5 | 1.08  | -1.49 | NA      | NA      | NA      | NA      | NA    | NA    |
| hsa_miR_34c     | 15.3 | 15.1 | 9.58 | 11.9 | 1.17  | -1.07 | 0.44036 | NA      | 0.83800 | NA      | 0.422 | NA    |
| hsa_miR_361     | 382  | 341  | 156  | 166  | 1.15  | -1.10 | 0.98903 | 0.80272 | 0.99702 | 0.92015 | 0.260 | 0.206 |
| hsa_miR_362     | 64   | 66.4 | 33.8 | 41.5 | -1.02 | -1.23 | 0.68319 | 0.19475 | 0.92294 | 0.60917 | 0.265 | 0.234 |
| hsa_miR_363     | 12.3 | 5.11 | 4.47 | 5.29 | NA    | NA    | NA      | NA      | NA      | NA      | NA    | NA    |
| hsa_miR_363_AS  | 22.2 | 27   | 12.3 | 13.9 | -1.07 | 1.12  | 0.98103 | NA      | 0.99699 | NA      | 0.384 | NA    |
| hsa_miR_365     | 28.9 | 28.4 | 20.4 | 21.4 | 1.00  | -1.00 | 0.94734 | NA      | 0.99342 | NA      | 0.333 | NA    |
| hsa_miR_367     | 13.6 | 10.7 | 6.31 | 4.19 | NA    | NA    | NA      | NA      | NA      | NA      | NA    | NA    |
| hsa_miR_368     | 9.06 | 6.43 | 4.71 | 5.45 | -1.52 | NA    | NA      | NA      | NA      | NA      | NA    | NA    |

|                 |       |       |      |      |       |       |         |         |         |         |       |       |
|-----------------|-------|-------|------|------|-------|-------|---------|---------|---------|---------|-------|-------|
| hsa_miR_369_3p  | 10.7  | 5.53  | 4.06 | 4.03 | NA    | NA    | NA      | NA      | NA      | NA      | NA    | NA    |
| hsa_miR_369_5p  | 15.6  | 15.2  | 5.43 | 5.55 | 1.64  | NA    | NA      | NA      | NA      | NA      | NA    | NA    |
| hsa_miR_370     | 77.6  | 91.2  | 51.2 | 41.8 | -1.23 | 1.20  | 0.20665 | 0.29006 | 0.70415 | 0.65579 | 0.261 | 0.231 |
| hsa_miR_371     | 11.5  | 8.44  | 4.67 | 4.24 | NA    | NA    | NA      | NA      | NA      | NA      | NA    | NA    |
| hsa_miR_372     | 7.78  | 4.73  | 6.12 | 6.09 | NA    | 2.13  | NA      | NA      | NA      | NA      | NA    | NA    |
| hsa_miR_373     | 6.2   | 7.3   | 5.28 | 5.09 | NA    | NA    | NA      | NA      | NA      | NA      | NA    | NA    |
| hsa_miR_373_AS  | 56.5  | 78.5  | 88.2 | 41   | -1.42 | 2.30  | 0.09041 | 0.00022 | 0.53991 | 0.02059 | 0.279 | 0.216 |
| hsa_miR_374     | 9.09  | 3.4   | 4.77 | 4.03 | NA    | NA    | NA      | NA      | NA      | NA      | NA    | NA    |
| hsa_miR_375     | 8.27  | 2.95  | 7.29 | 6.03 | NA    | NA    | NA      | NA      | NA      | NA      | NA    | NA    |
| hsa_miR_376a    | 8.67  | 3.38  | 5.56 | 3.76 | NA    | NA    | NA      | NA      | NA      | NA      | NA    | NA    |
| hsa_miR_376a_AS | 7.13  | 7.76  | 3.93 | 4.49 | NA    | NA    | NA      | NA      | NA      | NA      | NA    | NA    |
| hsa_miR_376b    | 9.7   | 4.87  | 6.26 | 3.74 | NA    | NA    | NA      | NA      | NA      | NA      | NA    | NA    |
| hsa_miR_377     | 18.3  | 11.7  | 5.5  | 5.53 | 1.08  | NA    | NA      | NA      | NA      | NA      | NA    | NA    |
| hsa_miR_378     | 969   | 995   | 525  | 450  | -1.07 | 1.12  | 0.68295 | 0.17792 | 0.92294 | 0.60917 | 0.240 | 0.142 |
| hsa_miR_379     | 63.3  | 80.8  | 25.7 | 43.1 | -1.05 | -1.52 | 0.36206 | 0.10440 | 0.81606 | 0.53557 | 0.282 | 0.265 |
| hsa_miR_380_3p  | 12.7  | 6.37  | 5.11 | 3.59 | NA    | NA    | NA      | NA      | NA      | NA      | NA    | NA    |
| hsa_miR_380_5p  | 8.66  | 7.31  | 3.16 | 6.2  | NA    | NA    | NA      | NA      | NA      | NA      | NA    | NA    |
| hsa_miR_381     | 18.5  | 15.3  | 4.49 | 8.1  | -1.51 | NA    | NA      | NA      | NA      | NA      | NA    | NA    |
| hsa_miR_382     | 23.3  | 21.3  | 8.16 | 15.2 | 1.25  | -1.22 | 0.55185 | NA      | 0.87307 | NA      | 0.439 | NA    |
| hsa_miR_383     | 14.3  | 12    | 14.6 | 13.4 | -1.70 | -2.09 | 0.11853 | NA      | 0.60065 | NA      | 0.443 | NA    |
| hsa_miR_384     | 8.82  | 6.51  | 4.96 | 3.97 | NA    | NA    | NA      | NA      | NA      | NA      | NA    | NA    |
| hsa_miR_409_3p  | 18.3  | 20.4  | 12.3 | 15.3 | -1.91 | -1.68 | NA      | NA      | NA      | NA      | NA    | NA    |
| hsa_miR_409_5p  | 14.9  | 13.4  | 10   | 10.8 | 1.19  | NA    | NA      | NA      | NA      | NA      | NA    | NA    |
| hsa_miR_410     | 8.01  | 7.39  | 5.34 | 5.89 | -1.04 | NA    | NA      | NA      | NA      | NA      | NA    | NA    |
| hsa_miR_412     | 6.05  | 4.78  | 4.86 | 3.63 | NA    | NA    | NA      | NA      | NA      | NA      | NA    | NA    |
| hsa_miR_422a    | 7161  | 7082  | 3079 | 2714 | -1.08 | 1.04  | 0.85895 | 0.72717 | 0.97422 | 0.89388 | 0.298 | 0.151 |
| hsa_miR_422b    | ##### | ##### | 6767 | 5748 | -1.25 | 1.16  | 0.45984 | 0.14076 | 0.84340 | 0.57499 | 0.333 | 0.150 |
| hsa_miR_423     | 142   | 130   | 59.7 | 65.7 | 1.00  | -1.19 | 0.82827 | 0.19084 | 0.97088 | 0.60917 | 0.225 | 0.219 |
| hsa_miR_424     | 43.6  | 25.9  | 15.2 | 23.5 | 1.52  | -1.25 | NA      | 0.84333 | NA      | 0.93359 | NA    | 0.429 |
| hsa_miR_425     | 75.7  | 73.7  | 34.9 | 38.7 | -1.04 | -1.29 | 0.92787 | 0.29995 | 0.98314 | 0.65702 | 0.269 | 0.246 |
| hsa_miR_429     | 11.5  | 7.83  | 6.59 | 4.26 | -1.18 | NA    | NA      | NA      | NA      | NA      | NA    | NA    |
| hsa_miR_431     | 14.3  | 8.64  | 4.77 | 6.07 | -1.07 | NA    | NA      | NA      | NA      | NA      | NA    | NA    |
| hsa_miR_432     | 58.1  | 76.8  | 37.6 | 33.1 | -1.34 | 1.23  | 0.31543 | 0.18928 | 0.80227 | 0.60917 | 0.277 | 0.240 |
| hsa_miR_432_AS  | 10    | 4.67  | 3.26 | 5.59 | NA    | NA    | NA      | NA      | NA      | NA      | NA    | NA    |
| hsa_miR_433     | 7.21  | 7.38  | 5.05 | 5.62 | NA    | NA    | NA      | NA      | NA      | NA      | NA    | NA    |
| hsa_miR_448     | 8.73  | 8.91  | 11.5 | 10.3 | NA    | NA    | NA      | NA      | NA      | NA      | NA    | NA    |
| hsa_miR_449     | 11.7  | 4.7   | 5.62 | 5.1  | NA    | NA    | NA      | NA      | NA      | NA      | NA    | NA    |
| hsa_miR_450     | 10.8  | 9.85  | 10.1 | 10.7 | -1.38 | 1.50  | NA      | NA      | NA      | NA      | NA    | NA    |
| hsa_miR_451     | 5372  | 6336  | 93.7 | 161  | -1.03 | -1.76 | 0.31856 | 0.00063 | 0.80283 | 0.03742 | 0.289 | 0.207 |
| hsa_miR_452     | 14.8  | 18.8  | 6.25 | 7.12 | NA    | NA    | NA      | NA      | NA      | NA      | NA    | NA    |
| hsa_miR_452_AS  | 6.04  | 7.05  | 3.28 | 2.57 | NA    | NA    | NA      | NA      | NA      | NA      | NA    | NA    |
| hsa_miR_453     | 34.8  | 60.6  | 34.8 | 33.9 | -1.45 | 1.16  | 0.91359 | 0.64886 | 0.98314 | 0.86792 | 0.287 | 0.260 |
| hsa_miR_455     | 24.7  | 22.2  | 9.51 | 12   | 1.15  | -1.31 | NA      | NA      | NA      | NA      | NA    | NA    |
| hsa_miR_483     | 111   | 93.4  | 90   | 69.3 | 1.27  | 1.27  | 0.16057 | 0.32485 | 0.64433 | 0.67215 | 0.256 | 0.204 |
| hsa_miR_484     | 118   | 98.8  | 45.1 | 45.6 | 1.14  | -1.09 | 0.46645 | 0.20827 | 0.84551 | 0.61003 | 0.319 | 0.225 |
| hsa_miR_485_3p  | 22.3  | 23.2  | 14.5 | 18   | -1.23 | -1.30 | 0.50072 | 0.50016 | 0.85276 | 0.79777 | 0.378 | 0.618 |
| hsa_miR_485_5p  | 28.7  | 37.1  | 16   | 14.2 | -1.26 | 1.26  | 0.51588 | 0.66631 | 0.86228 | 0.87126 | 0.320 | 0.584 |
| hsa_miR_486     | 4225  | 4249  | 1856 | 1458 | -1.23 | 1.05  | 0.12918 | 0.62788 | 0.62927 | 0.86330 | 0.302 | 0.148 |
| hsa_miR_487a    | 14.2  | 12.3  | 6.58 | 7.86 | NA    | NA    | NA      | NA      | NA      | NA      | NA    | NA    |
| hsa_miR_487b    | 12.5  | 8.15  | 5.39 | 9.32 | 1.43  | NA    | NA      | NA      | NA      | NA      | NA    | NA    |

|                   |      |      |      |      |       |       |         |         |         |         |       |       |
|-------------------|------|------|------|------|-------|-------|---------|---------|---------|---------|-------|-------|
| hsa_miR_488       | 8.54 | 4.86 | 5.18 | 8.6  | NA    | NA    | NA      | NA      | NA      | NA      | NA    | NA    |
| hsa_miR_489       | 10.2 | 4.57 | 2.38 | 6.82 | NA    | NA    | NA      | NA      | NA      | NA      | NA    | NA    |
| hsa_miR_490       | 62.4 | 62.2 | 27.1 | 33.8 | -1.02 | -1.29 | 0.81997 | 0.26361 | 0.97014 | 0.63284 | 0.279 | 0.276 |
| hsa_miR_491       | 246  | 71.1 | 50.8 | 53.1 | 3.76  | 1.05  | 0.00083 | 0.30453 | 0.04274 | 0.65909 | 0.362 | 0.270 |
| hsa_miR_492       | 45.5 | 61.4 | 39.9 | 35   | -1.41 | 1.19  | 0.17100 | 0.34209 | 0.66149 | 0.69000 | 0.273 | 0.249 |
| hsa_miR_493_3p    | 10.5 | 12.2 | 9.65 | 7.29 | 1.52  | NA    | NA      | NA      | NA      | NA      | NA    | NA    |
| hsa_miR_493_5p    | 8.41 | 5.38 | 3.99 | 7.43 | NA    | NA    | NA      | NA      | NA      | NA      | NA    | NA    |
| hsa_miR_494       | 201  | 378  | 301  | 159  | -1.75 | 2.16  | 0.10435 | 0.00097 | 0.57529 | 0.04509 | 0.395 | 0.275 |
| hsa_miR_495       | 22.3 | 14.3 | 7.67 | 7.78 | 1.10  | NA    | NA      | NA      | NA      | NA      | NA    | NA    |
| hsa_miR_496       | 8.42 | 2.72 | 4.56 | 4.11 | 6.16  | NA    | NA      | NA      | NA      | NA      | NA    | NA    |
| hsa_miR_497       | 843  | 738  | 333  | 326  | 1.10  | 1.02  | 0.85266 | 0.80277 | 0.97359 | 0.92015 | 0.268 | 0.163 |
| hsa_miR_498       | 13.4 | 10.8 | 14.2 | 13.4 | -1.01 | -1.10 | NA      | NA      | NA      | NA      | NA    | NA    |
| hsa_miR_499       | 1897 | 2169 | 698  | 838  | -1.06 | -1.22 | 0.89472 | 0.11339 | 0.98314 | 0.54560 | 0.268 | 0.133 |
| hsa_miR_500       | 130  | 163  | 56.4 | 68.6 | -1.21 | -1.25 | 0.83611 | 0.27601 | 0.97115 | 0.63607 | 0.225 | 0.213 |
| hsa_miR_501       | 30.8 | 23.9 | 12.6 | 15.3 | 1.38  | -1.32 | 0.63330 | NA      | 0.91450 | NA      | 0.344 | NA    |
| hsa_miR_502       | 17.4 | 20.5 | 12.8 | 10.1 | -1.35 | 1.56  | 0.42003 | NA      | 0.82429 | NA      | 0.629 | NA    |
| hsa_miR_503       | 63.1 | 48.4 | 18.4 | 21.5 | 1.23  | -1.19 | 0.18846 | 0.85160 | 0.67910 | 0.93624 | 0.291 | 0.580 |
| hsa_miR_504       | 12.8 | 13.9 | 3.85 | 9.72 | -1.75 | NA    | NA      | NA      | NA      | NA      | NA    | NA    |
| hsa_miR_505       | 7.36 | 5.25 | 5.21 | 7.41 | NA    | 1.46  | NA      | NA      | NA      | NA      | NA    | NA    |
| hsa_miR_506       | 13.9 | 14.8 | 5.53 | 5.89 | 1.04  | NA    | NA      | NA      | NA      | NA      | NA    | NA    |
| hsa_miR_507       | 18.2 | 9.17 | 4.84 | 6.02 | NA    | -1.67 | NA      | NA      | NA      | NA      | NA    | NA    |
| hsa_miR_508       | 4.35 | 7.16 | 4.98 | 2.68 | NA    | NA    | NA      | NA      | NA      | NA      | NA    | NA    |
| hsa_miR_509       | 10.1 | 8.99 | 4.42 | 3.08 | NA    | NA    | NA      | NA      | NA      | NA      | NA    | NA    |
| hsa_miR_510       | 13.3 | 13   | 7.16 | 6.15 | NA    | NA    | NA      | NA      | NA      | NA      | NA    | NA    |
| hsa_miR_511       | 57   | 60.5 | 28.9 | 32.7 | -1.13 | -1.22 | 0.98759 | 0.11034 | 0.99699 | 0.53830 | 0.278 | 0.259 |
| hsa_miR_512_3p    | 11   | 5.25 | 5.81 | 7.61 | NA    | -7.89 | NA      | NA      | NA      | NA      | NA    | NA    |
| hsa_miR_512_5p    | 16.9 | 9.69 | 8.23 | 5.28 | NA    | 1.73  | NA      | NA      | NA      | NA      | NA    | NA    |
| hsa_miR_513       | 54.2 | 82.7 | 51.1 | 42.9 | -1.36 | 1.38  | 0.57927 | 0.04653 | 0.89422 | 0.39727 | 0.326 | 0.221 |
| hsa_miR_514       | 7.93 | 2.16 | 3.19 | 3.14 | NA    | NA    | NA      | NA      | NA      | NA      | NA    | NA    |
| hsa_miR_515_3p    | 8.01 | 6.87 | 4.58 | 7.43 | NA    | NA    | NA      | NA      | NA      | NA      | NA    | NA    |
| hsa_miR_515_5p    | 5.38 | 8.22 | 3.5  | 8.61 | NA    | NA    | NA      | NA      | NA      | NA      | NA    | NA    |
| hsa_miR_516_3p    | 9.27 | 7.4  | 6.27 | 7.21 | NA    | 1.55  | NA      | NA      | NA      | NA      | NA    | NA    |
| hsa_miR_516_5p    | 9.83 | 8.98 | 4.42 | 7.89 | NA    | NA    | NA      | NA      | NA      | NA      | NA    | NA    |
| hsa_miR_517_AS    | 16.6 | 14.3 | 7.92 | 7.68 | NA    | 1.09  | NA      | NA      | NA      | NA      | NA    | NA    |
| hsa_miR_517a      | 10.8 | 4.87 | 7.39 | 3.9  | NA    | NA    | NA      | NA      | NA      | NA      | NA    | NA    |
| hsa_miR_517b      | 5.6  | 2.84 | 6.84 | 4.25 | NA    | NA    | NA      | NA      | NA      | NA      | NA    | NA    |
| hsa_miR_517c      | 9.82 | 12.8 | 8.7  | 5.43 | -4.57 | NA    | NA      | NA      | NA      | NA      | NA    | NA    |
| hsa_miR_518a      | 12.9 | 4.41 | 9.11 | 7    | NA    | NA    | NA      | NA      | NA      | NA      | NA    | NA    |
| hsa_miR_518a_2_AS | 11.6 | 8.93 | 10.4 | 6.68 | NA    | NA    | NA      | NA      | NA      | NA      | NA    | NA    |
| hsa_miR_518b      | 14.1 | 12.4 | 8.92 | 10.2 | -2.14 | -1.60 | NA      | NA      | NA      | NA      | NA    | NA    |
| hsa_miR_518c      | 8.34 | 8.83 | 8.2  | 3.74 | NA    | NA    | NA      | NA      | NA      | NA      | NA    | NA    |
| hsa_miR_518c_AS   | 30.7 | 47.6 | 18.9 | 20.6 | -1.50 | 1.20  | 0.02580 | 0.27069 | 0.36065 | 0.63334 | 0.320 | 0.373 |
| hsa_miR_518d      | 7.58 | 3.82 | 7.43 | 4.48 | NA    | NA    | NA      | NA      | NA      | NA      | NA    | NA    |
| hsa_miR_518e      | 8.02 | 4.09 | 4.66 | 4.34 | NA    | NA    | NA      | NA      | NA      | NA      | NA    | NA    |
| hsa_miR_518f      | 4.12 | 6.7  | 4.45 | 3.48 | NA    | NA    | NA      | NA      | NA      | NA      | NA    | NA    |
| hsa_miR_518f_AS   | 5.81 | 3.83 | 3.66 | 4.22 | NA    | NA    | NA      | NA      | NA      | NA      | NA    | NA    |
| hsa_miR_519a      | 13.9 | 11   | 5.64 | 5    | NA    | NA    | NA      | NA      | NA      | NA      | NA    | NA    |
| hsa_miR_519b      | 9.67 | 7.06 | 5.12 | 4.88 | NA    | NA    | NA      | NA      | NA      | NA      | NA    | NA    |
| hsa_miR_519c      | 5.17 | 4.03 | 5.76 | 2.54 | NA    | NA    | NA      | NA      | NA      | NA      | NA    | NA    |
| hsa_miR_519d      | 15.3 | 10.4 | 7.06 | 9.5  | 1.17  | -1.02 | NA      | NA      | NA      | NA      | NA    | NA    |

|                 |      |      |      |      |       |       |         |         |         |         |       |       |
|-----------------|------|------|------|------|-------|-------|---------|---------|---------|---------|-------|-------|
| hsa_miR_519e    | 6.03 | 3.24 | 6.07 | 3.5  | NA    | 3.41  | NA      | NA      | NA      | NA      | NA    | NA    |
| hsa_miR_519e_AS | 8.7  | 10   | 6.19 | 11.5 | NA    | 2.64  | NA      | NA      | NA      | NA      | NA    | NA    |
| hsa_miR_520a    | 10   | 4.19 | 6.49 | 5.6  | NA    | NA    | NA      | NA      | NA      | NA      | NA    | NA    |
| hsa_miR_520a_AS | 11.7 | 4.6  | 6.96 | 7.71 | NA    | NA    | NA      | NA      | NA      | NA      | NA    | NA    |
| hsa_miR_520b    | 8.79 | 4.99 | 4.38 | 4.48 | NA    | NA    | NA      | NA      | NA      | NA      | NA    | NA    |
| hsa_miR_520c    | 6.98 | 6.84 | 5.01 | 5.92 | 1.39  | 1.22  | NA      | NA      | NA      | NA      | NA    | NA    |
| hsa_miR_520d    | 15   | 16.8 | 10.1 | 6.67 | NA    | NA    | NA      | NA      | NA      | NA      | NA    | NA    |
| hsa_miR_520d_AS | 13.7 | 11.3 | 6.8  | 6.84 | NA    | NA    | NA      | NA      | NA      | NA      | NA    | NA    |
| hsa_miR_520e    | 6.6  | 4.68 | 9.81 | 6.15 | NA    | NA    | NA      | NA      | NA      | NA      | NA    | NA    |
| hsa_miR_520f    | 7.37 | 7.56 | 3.4  | 10.2 | NA    | NA    | NA      | NA      | NA      | NA      | NA    | NA    |
| hsa_miR_520g    | 8.9  | 6.06 | 3.54 | 3.83 | NA    | NA    | NA      | NA      | NA      | NA      | NA    | NA    |
| hsa_miR_520h    | 8.29 | 6.19 | 4.21 | 4.25 | NA    | NA    | NA      | NA      | NA      | NA      | NA    | NA    |
| hsa_miR_521     | 15.2 | 5.92 | 3.13 | 4.03 | NA    | NA    | NA      | NA      | NA      | NA      | NA    | NA    |
| hsa_miR_522     | 7.47 | 6.39 | 4.88 | 3.55 | NA    | NA    | NA      | NA      | NA      | NA      | NA    | NA    |
| hsa_miR_523     | 15.3 | 11.9 | 4.74 | 4.03 | NA    | NA    | NA      | NA      | NA      | NA      | NA    | NA    |
| hsa_miR_524     | 7.5  | 3.79 | 15.3 | 9.08 | NA    | NA    | NA      | NA      | NA      | NA      | NA    | NA    |
| hsa_miR_524_AS  | 7.45 | 8.18 | 6.51 | 5.29 | NA    | NA    | NA      | NA      | NA      | NA      | NA    | NA    |
| hsa_miR_525     | 18.9 | 15   | 8.43 | 11   | NA    | NA    | NA      | NA      | NA      | NA      | NA    | NA    |
| hsa_miR_525_AS  | 7.55 | 3.23 | 4.84 | 4.86 | NA    | NA    | NA      | NA      | NA      | NA      | NA    | NA    |
| hsa_miR_526a    | 9.66 | 7.41 | 6.98 | 5.1  | NA    | NA    | NA      | NA      | NA      | NA      | NA    | NA    |
| hsa_miR_526b    | 22   | 12.5 | 10.2 | 5.97 | 1.30  | NA    | NA      | NA      | NA      | NA      | NA    | NA    |
| hsa_miR_526b_AS | 4.5  | 3.64 | 4.08 | 4.09 | NA    | NA    | NA      | NA      | NA      | NA      | NA    | NA    |
| hsa_miR_526c    | 11.4 | 4.76 | 5.69 | 5.47 | 1.38  | NA    | NA      | NA      | NA      | NA      | NA    | NA    |
| hsa_miR_527     | 9.98 | 14.7 | 8    | 7.02 | NA    | NA    | NA      | NA      | NA      | NA      | NA    | NA    |
| hsa_miR_539     | 7.36 | 8.24 | 6.73 | 5.35 | -2.31 | NA    | NA      | NA      | NA      | NA      | NA    | NA    |
| hsa_miR_542_3p  | 8.59 | 9.25 | 4.95 | 5.45 | -2.19 | NA    | NA      | NA      | NA      | NA      | NA    | NA    |
| hsa_miR_542_5p  | 28   | 14.1 | 12.7 | 9.55 | 1.83  | 1.33  | 0.19459 | NA      | 0.69138 | NA      | 0.426 | NA    |
| hsa_miR_544     | 9.39 | 4.1  | 15.4 | 10.8 | NA    | NA    | NA      | NA      | NA      | NA      | NA    | NA    |
| hsa_miR_545     | 6.42 | 3.34 | 4.62 | 4.67 | NA    | NA    | NA      | NA      | NA      | NA      | NA    | NA    |
| hsa_miR_7       | 59.2 | 20.5 | 10.2 | 14   | 3.35  | -1.62 | 0.00052 | NA      | 0.04274 | NA      | 0.327 | NA    |
| hsa_miR_9       | 19.6 | 16.8 | 7.34 | 9.59 | -2.47 | NA    | NA      | NA      | NA      | NA      | NA    | NA    |
| hsa_miR_9_AS    | 17.3 | 16.3 | 6.06 | 8.14 | 1.15  | NA    | 0.16919 | NA      | 0.65814 | NA      | 0.611 | NA    |
| hsa_miR_92      | 305  | 215  | 92.9 | 97.9 | 1.24  | -1.15 | 0.31474 | 0.69437 | 0.80227 | 0.88138 | 0.236 | 0.199 |
| hsa_miR_93      | 1317 | 1408 | 371  | 424  | -1.04 | -1.08 | 0.61758 | 0.28218 | 0.91139 | 0.64611 | 0.249 | 0.148 |
| hsa_miR_95      | 13.4 | 16.4 | 4.31 | 6.63 | -1.94 | NA    | 0.07205 | NA      | 0.52823 | NA      | 0.468 | NA    |
| hsa_miR_96      | 11.3 | 3.11 | 5.51 | 5.38 | NA    | NA    | NA      | NA      | NA      | NA      | NA    | NA    |
| hsa_miR_98      | 170  | 239  | 57.1 | 88.8 | -1.20 | -1.31 | 0.05426 | 0.00230 | 0.49151 | 0.07221 | 0.230 | 0.210 |
| hsa_miR_99a     | #### | #### | 5985 | 5495 | 1.10  | 1.03  | 0.98758 | 0.97093 | 0.99699 | 0.98569 | 0.343 | 0.137 |
| hsa_miR_99b     | 681  | 546  | 283  | 234  | 1.10  | 1.11  | 0.66115 | 0.23021 | 0.91736 | 0.61740 | 0.240 | 0.175 |
| mmu_let_7a      | #### | #### | #### | #### | -1.16 | -1.02 | 0.23313 | 0.19397 | 0.73613 | 0.60917 | 0.361 | 0.133 |
| mmu_let_7d_AS   | 48.8 | 62   | 46.8 | 37.5 | -1.39 | 1.28  | 0.37586 | 0.51560 | 0.81606 | 0.80549 | 0.277 | 0.252 |
| mmu_let_7f      | 9920 | #### | 4144 | 4998 | -1.03 | -1.19 | 0.77912 | 0.31996 | 0.95626 | 0.67177 | 0.361 | 0.149 |
| mmu_miR_101b    | 228  | 264  | 135  | 160  | -1.04 | -1.15 | 0.57615 | 0.75299 | 0.89156 | 0.90115 | 0.238 | 0.425 |
| mmu_miR_106a    | 301  | 263  | 95.7 | 120  | 1.23  | -1.18 | 0.64940 | 0.25299 | 0.91450 | 0.63100 | 0.254 | 0.204 |
| mmu_miR_10b     | 212  | 251  | 105  | 115  | -1.14 | 1.01  | 0.57005 | 0.38373 | 0.88949 | 0.71706 | 0.237 | 0.203 |
| mmu_miR_124a    | 14.8 | 16.2 | 9    | 8.43 | -1.13 | -1.05 | 0.98046 | NA      | 0.99699 | NA      | 0.612 | NA    |
| mmu_miR_127     | 23.2 | 22.9 | 7.44 | 6.75 | 1.03  | NA    | 0.83995 | NA      | 0.97138 | NA      | 0.422 | NA    |
| mmu_miR_129_5p  | 16   | 17.6 | 8.89 | 10.9 | -1.67 | -1.16 | NA      | NA      | NA      | NA      | NA    | NA    |
| mmu_miR_134     | 33.2 | 52.9 | 28.1 | 28.7 | -1.35 | 1.05  | 0.16374 | 0.70709 | 0.64882 | 0.88138 | 0.333 | 0.292 |
| mmu_miR_137     | 12.4 | 6.13 | 4.01 | 7.8  | NA    | NA    | NA      | NA      | NA      | NA      | NA    | NA    |

|                 |      |      |      |      |       |       |         |         |         |         |       |       |
|-----------------|------|------|------|------|-------|-------|---------|---------|---------|---------|-------|-------|
| mmu_miR_140     | 166  | 146  | 58.6 | 75.7 | 1.08  | -1.36 | 0.62015 | 0.03712 | 0.91139 | 0.36329 | 0.251 | 0.211 |
| mmu_miR_140_AS  | 526  | 590  | 209  | 228  | -1.18 | -1.15 | 0.21015 | 0.19234 | 0.70415 | 0.60917 | 0.248 | 0.183 |
| mmu_miR_142_3p  | 19.1 | 22   | 11.5 | 13.7 | 1.12  | NA    | 0.26006 | NA      | 0.76411 | NA      | 0.426 | NA    |
| mmu_miR_151     | 190  | 173  | 87.1 | 86.5 | -1.03 | -1.10 | 0.63406 | 0.25945 | 0.91450 | 0.63284 | 0.257 | 0.196 |
| mmu_miR_153     | 27.5 | 15.9 | 15.9 | 13.9 | 1.41  | 1.13  | 0.09374 | NA      | 0.55387 | NA      | 0.410 | NA    |
| mmu_miR_155     | 177  | 146  | 90.5 | 89.7 | 1.30  | 1.01  | 0.07628 | 0.93052 | 0.53269 | 0.96689 | 0.244 | 0.202 |
| mmu_miR_17_3p   | 67.9 | 84.9 | 34.4 | 42.9 | -1.23 | -1.26 | 0.31492 | 0.32551 | 0.80227 | 0.67215 | 0.459 | 0.237 |
| mmu_miR_187     | 126  | 119  | 77.2 | 71   | -1.01 | 1.02  | 0.96616 | 0.96890 | 0.99699 | 0.98459 | 0.245 | 0.200 |
| mmu_miR_192     | 143  | 115  | 68.7 | 70.5 | 1.24  | -1.02 | 0.47754 | 0.93791 | 0.84660 | 0.96972 | 0.234 | 0.206 |
| mmu_miR_199b    | 1741 | 2077 | 812  | 883  | -1.19 | -1.10 | 0.78493 | 0.47132 | 0.95732 | 0.78207 | 0.270 | 0.134 |
| mmu_miR_201     | 7.19 | 4.2  | 4.13 | 4.03 | NA    | NA    | NA      | NA      | NA      | NA      | NA    | NA    |
| mmu_miR_202     | 25.9 | 33.4 | 13.2 | 13.8 | -1.94 | 1.42  | NA      | NA      | NA      | NA      | NA    | NA    |
| mmu_miR_203     | 234  | 201  | 90.8 | 97.8 | 1.17  | -1.15 | 0.97280 | 0.33499 | 0.99699 | 0.68350 | 0.246 | 0.199 |
| mmu_miR_204     | 264  | 195  | 89   | 110  | 1.28  | -1.25 | 0.13936 | 0.17465 | 0.63364 | 0.60917 | 0.242 | 0.202 |
| mmu_miR_207     | 26   | 22.9 | 21.8 | 15.1 | -1.03 | 1.47  | 0.83678 | NA      | 0.97115 | NA      | 0.409 | NA    |
| mmu_miR_20b     | 132  | 124  | 46.1 | 58.9 | 1.22  | -1.15 | 0.61866 | 0.29737 | 0.91139 | 0.65691 | 0.243 | 0.222 |
| mmu_miR_211     | 6.52 | 3.6  | 3.97 | 6.38 | NA    | NA    | NA      | NA      | NA      | NA      | NA    | NA    |
| mmu_miR_215     | 30.5 | 28.6 | 10.1 | 13.9 | 1.32  | -1.07 | 0.82303 | NA      | 0.97024 | NA      | 0.498 | NA    |
| mmu_miR_217     | 5.83 | 6.11 | 4.51 | 6.2  | NA    | NA    | NA      | NA      | NA      | NA      | NA    | NA    |
| mmu_miR_221     | 3071 | 2431 | 1069 | 1160 | 1.21  | -1.14 | 0.36975 | 0.22768 | 0.81606 | 0.61658 | 0.267 | 0.141 |
| mmu_miR_224     | 31.1 | 22.7 | 12.2 | 21.1 | 1.39  | -1.76 | 0.01466 | NA      | 0.29860 | NA      | 0.320 | NA    |
| mmu_miR_290     | 42.9 | 64.7 | 41.2 | 34.2 | -1.47 | 1.44  | 0.05568 | 0.32568 | 0.49151 | 0.67215 | 0.277 | 0.271 |
| mmu_miR_291a_3p | 43.6 | 38.1 | 19.1 | 24.4 | 1.19  | -1.33 | 0.32291 | NA      | 0.80394 | NA      | 0.279 | NA    |
| mmu_miR_291a_5p | 6.28 | 6.88 | 6.05 | 5.98 | NA    | NA    | NA      | NA      | NA      | NA      | NA    | NA    |
| mmu_miR_291b_3p | 7.21 | 2.65 | 10.9 | 14.4 | NA    | NA    | NA      | NA      | NA      | NA      | NA    | NA    |
| mmu_miR_291b_5p | 10.7 | 7.38 | 9.51 | 6.61 | NA    | 2.22  | NA      | NA      | NA      | NA      | NA    | NA    |
| mmu_miR_292_3p  | 9.25 | 8.8  | 11.3 | 9.84 | -1.97 | 1.54  | NA      | NA      | NA      | NA      | NA    | NA    |
| mmu_miR_292_5p  | 14.3 | 19.3 | 13.4 | 13.3 | -7.39 | 1.18  | NA      | NA      | NA      | NA      | NA    | NA    |
| mmu_miR_293     | 10.4 | 3.84 | 6.16 | 5.46 | NA    | NA    | NA      | NA      | NA      | NA      | NA    | NA    |
| mmu_miR_294     | 6.65 | 8.95 | 6.99 | 5.98 | -3.63 | NA    | NA      | NA      | NA      | NA      | NA    | NA    |
| mmu_miR_295     | 7.56 | 7.25 | 4.31 | 4.66 | NA    | NA    | NA      | NA      | NA      | NA      | NA    | NA    |
| mmu_miR_297     | 32.8 | 13.8 | 11.1 | 11.2 | 2.65  | 3.63  | NA      | NA      | NA      | NA      | NA    | NA    |
| mmu_miR_298     | 67.8 | 93   | 50.2 | 46.8 | -1.24 | 1.13  | 0.60196 | 0.25160 | 0.90548 | 0.63100 | 0.297 | 0.233 |
| mmu_miR_300     | 26.5 | 26.9 | 14.1 | 15   | -1.04 | 1.02  | 0.40358 | 0.82337 | 0.81772 | 0.92976 | 0.346 | 0.543 |
| mmu_miR_302b_AS | 17.2 | 32.5 | 6.08 | 9.44 | -1.90 | NA    | 0.07271 | NA      | 0.52823 | NA      | 0.454 | NA    |
| mmu_miR_302c    | 7.92 | 5.21 | 4.24 | 6.15 | NA    | NA    | NA      | NA      | NA      | NA      | NA    | NA    |
| mmu_miR_302c_AS | 12.4 | 10   | 7.45 | 8.27 | NA    | -1.07 | NA      | NA      | NA      | NA      | NA    | NA    |
| mmu_miR_30e_AS  | 250  | 230  | 112  | 126  | 1.05  | -1.16 | 0.73709 | 0.12672 | 0.94049 | 0.56533 | 0.236 | 0.207 |
| mmu_miR_31      | 504  | 566  | 243  | 280  | -1.11 | -1.17 | 0.47486 | 0.21163 | 0.84660 | 0.61003 | 0.238 | 0.190 |
| mmu_miR_322     | 178  | 140  | 80.2 | 79.3 | 1.17  | -1.04 | 0.26127 | 0.83386 | 0.76576 | 0.93165 | 0.239 | 0.201 |
| mmu_miR_324_5p  | 25.4 | 27.2 | 17.1 | 19.3 | -1.03 | -1.04 | 0.74414 | NA      | 0.94094 | NA      | 0.376 | NA    |
| mmu_miR_325     | 14.9 | 18.5 | 7.96 | 9.91 | NA    | NA    | NA      | NA      | NA      | NA      | NA    | NA    |
| mmu_miR_326     | 18.1 | 22.8 | 12.3 | 10.4 | -1.48 | 1.31  | 0.28490 | NA      | 0.78405 | NA      | 0.835 | NA    |
| mmu_miR_329     | 30.4 | 19.7 | 9.03 | 11.3 | 1.33  | 1.14  | NA      | NA      | NA      | NA      | NA    | NA    |
| mmu_miR_330     | 29.6 | 28.2 | 15   | 12.8 | -1.04 | 1.17  | 0.59824 | NA      | 0.90290 | NA      | 0.455 | NA    |
| mmu_miR_337     | 20.9 | 13.8 | 4.88 | 9.9  | 1.77  | NA    | NA      | NA      | NA      | NA      | NA    | NA    |
| mmu_miR_341     | 21.1 | 9.7  | 5.11 | 8.16 | 1.47  | NA    | NA      | NA      | NA      | NA      | NA    | NA    |
| mmu_miR_344     | 5.05 | 4.73 | 6.2  | 4.95 | NA    | NA    | NA      | NA      | NA      | NA      | NA    | NA    |
| mmu_miR_345     | 319  | 327  | 181  | 175  | 1.01  | -1.01 | 0.52674 | 0.95323 | 0.86468 | 0.97625 | 0.255 | 0.211 |
| mmu_miR_346     | 40.5 | 30.3 | 25   | 22.7 | 1.36  | 1.22  | 0.21202 | 0.40394 | 0.70785 | 0.73175 | 0.299 | 0.303 |

|                 |      |      |      |      |       |       |         |         |         |         |       |       |
|-----------------|------|------|------|------|-------|-------|---------|---------|---------|---------|-------|-------|
| mmu_miR_34b     | 11.3 | 14.4 | 9.66 | 16.8 | -1.69 | -1.66 | NA      | NA      | NA      | NA      | NA    | NA    |
| mmu_miR_350     | 308  | 205  | 106  | 120  | 1.32  | -1.20 | 0.21036 | 0.08343 | 0.70415 | 0.50095 | 0.248 | 0.215 |
| mmu_miR_351     | 125  | 110  | 64.5 | 61.9 | 1.17  | 1.05  | 0.80021 | 0.70124 | 0.96748 | 0.88138 | 0.226 | 0.221 |
| mmu_miR_362     | 108  | 89.2 | 40.8 | 48.6 | 1.13  | -1.19 | 0.15144 | 0.38563 | 0.63882 | 0.71818 | 0.234 | 0.275 |
| mmu_miR_363     | 4.65 | 6.18 | 4.19 | 4.95 | NA    | NA    | NA      | NA      | NA      | NA      | NA    | NA    |
| mmu_miR_369_3p  | 5.43 | 2.34 | 4.25 | 4.38 | NA    | NA    | NA      | NA      | NA      | NA      | NA    | NA    |
| mmu_miR_369_5p  | 13.7 | 19.9 | 9    | 7.9  | -1.17 | -1.26 | NA      | NA      | NA      | NA      | NA    | NA    |
| mmu_miR_370     | 60.4 | 74.5 | 36.4 | 39.9 | -1.16 | 1.02  | 0.46593 | 0.69176 | 0.84551 | 0.88138 | 0.299 | 0.245 |
| mmu_miR_376a    | 11.9 | 8.48 | 6.72 | 4.59 | NA    | NA    | NA      | NA      | NA      | NA      | NA    | NA    |
| mmu_miR_376b    | 12.2 | 12.2 | 6.01 | 8.59 | -1.71 | NA    | NA      | NA      | NA      | NA      | NA    | NA    |
| mmu_miR_376b_AS | 8.12 | 8.23 | 4.35 | 2.87 | NA    | NA    | NA      | NA      | NA      | NA      | NA    | NA    |
| mmu_miR_376c    | 8.9  | 7.21 | 5.22 | 6.91 | NA    | NA    | NA      | NA      | NA      | NA      | NA    | NA    |
| mmu_miR_379     | 57.6 | 67.5 | 30   | 38.7 | -1.03 | -1.19 | 0.69783 | 0.01498 | 0.92294 | 0.24381 | 0.275 | 0.266 |
| mmu_miR_380_3p  | 7.97 | 4.94 | 5.69 | 4.94 | NA    | NA    | NA      | NA      | NA      | NA      | NA    | NA    |
| mmu_miR_383     | 19.1 | 15.8 | 5.64 | 6.37 | NA    | 1.56  | NA      | NA      | NA      | NA      | NA    | NA    |
| mmu_miR_384     | 6.19 | 4.07 | 5.11 | 4.01 | NA    | 1.29  | NA      | NA      | NA      | NA      | NA    | NA    |
| mmu_miR_409     | 22.1 | 19.5 | 11.7 | 14.5 | 1.17  | -1.22 | 0.27341 | NA      | 0.77549 | NA      | 0.406 | NA    |
| mmu_miR_410     | 5.99 | 4.3  | 6.16 | 1.59 | NA    | NA    | NA      | NA      | NA      | NA      | NA    | NA    |
| mmu_miR_411     | 18.4 | 13.6 | 8.22 | 10.3 | 1.25  | NA    | NA      | NA      | NA      | NA      | NA    | NA    |
| mmu_miR_424     | 45.6 | 38.1 | 17.5 | 19.8 | 1.27  | -1.10 | 0.23376 | NA      | 0.73613 | NA      | 0.283 | NA    |
| mmu_miR_429     | 17.1 | 12.5 | 3.25 | 4.67 | NA    | NA    | NA      | NA      | NA      | NA      | NA    | NA    |
| mmu_miR_431     | 10.7 | 5.96 | 5.98 | 4.26 | NA    | NA    | NA      | NA      | NA      | NA      | NA    | NA    |
| mmu_miR_433_5p  | 6.03 | 8.5  | 5.36 | 4.57 | NA    | NA    | NA      | NA      | NA      | NA      | NA    | NA    |
| mmu_miR_434_3p  | 19.5 | 9.34 | 5.71 | 5.96 | 2.01  | NA    | 0.04801 | NA      | 0.46613 | NA      | 0.441 | NA    |
| mmu_miR_434_5p  | 25.6 | 20.5 | 8.07 | 11.3 | 1.10  | -1.10 | NA      | NA      | NA      | NA      | NA    | NA    |
| mmu_miR_451     | 4764 | 5810 | 95.2 | 136  | -1.07 | -1.48 | 0.99639 | 0.00329 | 0.99738 | 0.09324 | 0.328 | 0.209 |
| mmu_miR_463     | 6.67 | 7.13 | 4.03 | 3.23 | NA    | NA    | NA      | NA      | NA      | NA      | NA    | NA    |
| mmu_miR_464     | 10.4 | 4.98 | 3.27 | 5.83 | NA    | NA    | NA      | NA      | NA      | NA      | NA    | NA    |
| mmu_miR_465     | 16.3 | 6.99 | 5.63 | 5.81 | NA    | NA    | NA      | NA      | NA      | NA      | NA    | NA    |
| mmu_miR_466     | 48.6 | 28.5 | 23.5 | 22.3 | 1.56  | -1.06 | 0.04000 | 0.14820 | 0.44034 | 0.58905 | 0.320 | 0.326 |
| mmu_miR_467     | 16.1 | 6.57 | 14.2 | 9.58 | 1.88  | 1.61  | NA      | NA      | NA      | NA      | NA    | NA    |
| mmu_miR_468     | 36.8 | 9.28 | 13.2 | 13.9 | 4.56  | 1.02  | NA      | NA      | NA      | NA      | NA    | NA    |
| mmu_miR_469     | 14.6 | 4.41 | 5.97 | 5.11 | NA    | NA    | NA      | NA      | NA      | NA      | NA    | NA    |
| mmu_miR_470     | 7.27 | 6.46 | 4.61 | 3.57 | NA    | NA    | NA      | NA      | NA      | NA      | NA    | NA    |
| mmu_miR_471     | 7    | 10.3 | 6.14 | 4.47 | NA    | NA    | NA      | NA      | NA      | NA      | NA    | NA    |
| mmu_miR_483     | 25.4 | 22   | 23.7 | 21.2 | 1.08  | 1.23  | 0.64961 | 0.40997 | 0.91450 | 0.73767 | 0.365 | 0.377 |
| mmu_miR_485_3p  | 10.1 | 5.05 | 3.52 | 6.13 | NA    | NA    | NA      | NA      | NA      | NA      | NA    | NA    |
| mmu_miR_487b    | 7.83 | 3.49 | 4.67 | 2.87 | NA    | NA    | NA      | NA      | NA      | NA      | NA    | NA    |
| mmu_miR_489     | 4.86 | 3.91 | 4.83 | 5.12 | NA    | -1.44 | NA      | NA      | NA      | NA      | NA    | NA    |
| mmu_miR_494     | 211  | 353  | 279  | 139  | -1.65 | 2.17  | 0.03518 | 0.00023 | 0.41746 | 0.02059 | 0.374 | 0.231 |
| mmu_miR_503     | 87.4 | 73.1 | 32.8 | 32.7 | 1.08  | -1.02 | 0.89734 | 0.97842 | 0.98314 | 0.98710 | 0.260 | 0.251 |
| mmu_miR_540     | 29.9 | 38.7 | 18.9 | 23.1 | -1.45 | 1.15  | 0.29936 | 0.88153 | 0.80227 | 0.95106 | 0.283 | 0.283 |
| mmu_miR_541     | 26.8 | 27.4 | 15.5 | 17.9 | 1.06  | -1.09 | 0.69759 | 0.06645 | 0.92294 | 0.47270 | 0.302 | 0.323 |
| mmu_miR_542_5p  | 18.7 | 15.7 | 6.74 | 7.78 | 1.10  | NA    | NA      | NA      | NA      | NA      | NA    | NA    |
| mmu_miR_543     | 11.4 | 12.8 | 7.37 | 4.68 | -1.40 | NA    | NA      | NA      | NA      | NA      | NA    | NA    |
| mmu_miR_546     | 103  | 146  | 81.8 | 64.8 | -1.47 | 1.30  | 0.08126 | 0.04650 | 0.53791 | 0.39727 | 0.220 | 0.218 |
| mmu_miR_547     | 23.4 | 17.5 | 7.68 | 8.13 | 1.60  | -1.20 | 0.25419 | NA      | 0.75792 | NA      | 0.347 | NA    |
| mmu_miR_7b      | 9.01 | 4.57 | 4.67 | 6.25 | NA    | NA    | NA      | NA      | NA      | NA      | NA    | NA    |
| mmu_miR_9       | 5.72 | 5.3  | 1.72 | 8.66 | NA    | NA    | NA      | NA      | NA      | NA      | NA    | NA    |
| mmu_miR_93      | 661  | 721  | 239  | 255  | -1.07 | -1.04 | 0.81390 | 0.51245 | 0.96748 | 0.80442 | 0.238 | 0.187 |

|                |      |      |      |      |       |       |         |         |         |         |       |       |
|----------------|------|------|------|------|-------|-------|---------|---------|---------|---------|-------|-------|
| mmu_miR_96     | 5.77 | 4.93 | 6.05 | 4.25 | NA    | NA    | NA      | NA      | NA      | NA      | NA    | NA    |
| mmu_miR_99a    | #### | #### | 6168 | 5463 | 1.01  | 1.12  | 0.99047 | 0.29549 | 0.99702 | 0.65684 | 0.318 | 0.137 |
| rno_miR_1      | 541  | 738  | 198  | 289  | -1.16 | -1.27 | 0.26602 | 0.19108 | 0.76980 | 0.60917 | 0.502 | 0.201 |
| rno_miR_1_AS   | 12.1 | 6.83 | 5.96 | 6.44 | 1.34  | -1.68 | NA      | NA      | NA      | NA      | NA    | NA    |
| rno_miR_140_AS | 511  | 607  | 207  | 236  | -1.23 | -1.18 | 0.11161 | 0.19759 | 0.58566 | 0.60917 | 0.239 | 0.189 |
| rno_miR_151    | 154  | 148  | 77.3 | 73   | -1.05 | -1.04 | 0.97294 | 0.86725 | 0.99699 | 0.94506 | 0.224 | 0.197 |
| rno_miR_207    | 23   | 13.7 | 19.8 | 17.1 | 1.35  | -1.03 | NA      | NA      | NA      | NA      | NA    | NA    |
| rno_miR_20a_AS | 8.9  | 5.51 | 5.35 | 5.24 | NA    | NA    | NA      | NA      | NA      | NA      | NA    | NA    |
| rno_miR_20b    | 69.2 | 51   | 14   | 22   | 1.61  | -1.61 | 0.14373 | NA      | 0.63364 | NA      | 0.297 | NA    |
| rno_miR_20b_AS | 11.6 | 10.6 | 11.2 | 8.12 | -1.61 | NA    | 0.51800 | NA      | 0.86290 | NA      | 0.508 | NA    |
| rno_miR_22_AS  | 119  | 119  | 105  | 110  | -1.15 | -1.08 | 0.15592 | 0.68519 | 0.64433 | 0.88051 | 0.230 | 0.227 |
| rno_miR_297    | 11.2 | 5.65 | 8.81 | 8.55 | -1.02 | NA    | NA      | NA      | NA      | NA      | NA    | NA    |
| rno_miR_29c_AS | 128  | 125  | 48.9 | 69.9 | -1.01 | -1.35 | 0.97054 | 0.05064 | 0.99699 | 0.40727 | 0.234 | 0.259 |
| rno_miR_301    | 63.2 | 57.4 | 31.4 | 33.1 | 1.13  | -1.33 | 0.48625 | NA      | 0.85193 | NA      | 0.260 | NA    |
| rno_miR_327    | 22.4 | 35.6 | 24   | 21.3 | -1.45 | 1.17  | 0.30007 | 0.66572 | 0.80227 | 0.87126 | 0.312 | 0.448 |
| rno_miR_333    | 9.04 | 4    | 8.02 | 6.08 | NA    | 1.18  | NA      | NA      | NA      | NA      | NA    | NA    |
| rno_miR_336    | 82.9 | 70.6 | 54.4 | 53   | 1.30  | 1.00  | 0.07113 | 0.48048 | 0.52823 | 0.78682 | 0.270 | 0.225 |
| rno_miR_343    | 10.9 | 13.2 | 13   | 14.6 | -1.28 | 1.16  | NA      | NA      | NA      | NA      | NA    | NA    |
| rno_miR_344    | 8.91 | 6.24 | 5.14 | 8.42 | NA    | NA    | NA      | NA      | NA      | NA      | NA    | NA    |
| rno_miR_346    | 54.8 | 29.1 | 24.4 | 20.7 | 1.88  | 2.25  | 0.10405 | NA      | 0.57529 | NA      | 0.406 | NA    |
| rno_miR_347    | 10.8 | 6.12 | 5.88 | 5.67 | NA    | NA    | NA      | NA      | NA      | NA      | NA    | NA    |
| rno_miR_349    | 10.6 | 12.9 | 12.7 | 9.32 | -6.44 | -1.97 | NA      | NA      | NA      | NA      | NA    | NA    |
| rno_miR_350    | 380  | 299  | 137  | 154  | 1.17  | -1.17 | 0.17954 | 0.46741 | 0.66751 | 0.78048 | 0.246 | 0.210 |
| rno_miR_352    | 1078 | 1103 | 317  | 411  | 1.12  | -1.16 | 0.55038 | 0.09581 | 0.87307 | 0.52482 | 0.350 | 0.173 |
| rno_miR_363_3p | 6.38 | 4.22 | 4.94 | 7.68 | NA    | -1.56 | NA      | NA      | NA      | NA      | NA    | NA    |
| rno_miR_374    | 56.6 | 57   | 17.6 | 25.8 | 1.05  | -1.50 | 0.87998 | 0.52774 | 0.97750 | 0.81491 | 0.277 | 0.402 |
| rno_miR_376a   | 9.59 | 6.33 | 7.19 | 5.33 | NA    | NA    | NA      | NA      | NA      | NA      | NA    | NA    |
| rno_miR_376b   | 14.3 | 14.4 | 7.21 | 5.4  | -1.41 | NA    | NA      | NA      | NA      | NA      | NA    | NA    |
| rno_miR_377    | 11.8 | 14.2 | 7.41 | 9.31 | -1.28 | NA    | 0.24447 | NA      | 0.74930 | NA      | 0.538 | NA    |
| rno_miR_381    | 16.2 | 15.8 | 4.79 | 5.55 | NA    | NA    | NA      | NA      | NA      | NA      | NA    | NA    |
| rno_miR_382    | 39.4 | 35.6 | 10.4 | 18.4 | 1.15  | -1.74 | 0.14744 | NA      | 0.63364 | NA      | 0.283 | NA    |
| rno_miR_382_AS | 49   | 33.6 | 16.8 | 20.7 | 1.40  | -1.30 | 0.04374 | 0.16142 | 0.45036 | 0.59821 | 0.274 | 0.474 |
| rno_miR_409_3p | 23.7 | 15.6 | 14.1 | 12.1 | 1.40  | 1.01  | 0.10964 | NA      | 0.58566 | NA      | 0.417 | NA    |
| rno_miR_409_5p | 8.74 | 4.52 | 3.91 | 7.23 | NA    | NA    | NA      | NA      | NA      | NA      | NA    | NA    |
| rno_miR_421    | 9.53 | 7.3  | 3.66 | 4.19 | -1.73 | NA    | NA      | NA      | NA      | NA      | NA    | NA    |
| rno_miR_422b   | #### | #### | 8371 | 7277 | -1.14 | 1.15  | 0.05691 | 0.07927 | 0.49151 | 0.50045 | 0.335 | 0.147 |
| rno_miR_450    | 5.94 | 4.22 | 7.33 | 3.91 | NA    | NA    | NA      | NA      | NA      | NA      | NA    | NA    |
| rno_miR_489    | 14.2 | 4.27 | 6.34 | 4.91 | NA    | NA    | NA      | NA      | NA      | NA      | NA    | NA    |
| rno_miR_497    | 1074 | 785  | 445  | 426  | 1.30  | 1.04  | 0.25616 | 0.61490 | 0.75899 | 0.86289 | 0.249 | 0.144 |
| rno_miR_499    | 981  | 1140 | 385  | 473  | -1.08 | -1.22 | 0.42162 | 0.08098 | 0.82429 | 0.50045 | 0.266 | 0.147 |
| rno_miR_501    | 20.2 | 15.2 | 10.6 | 8.32 | 1.23  | 3.00  | 0.86829 | 0.19029 | 0.97422 | 0.60917 | 0.427 | 1.148 |
| rno_miR_503    | 80.6 | 71   | 25.8 | 31.7 | 1.02  | -1.25 | 0.96784 | 0.33220 | 0.99699 | 0.68165 | 0.308 | 0.333 |
| rno_miR_505    | 5.75 | 4.01 | 4.46 | 4.12 | NA    | NA    | NA      | NA      | NA      | NA      | NA    | NA    |
| rno_miR_542_3p | 10.4 | 8.9  | 4.42 | 6.5  | NA    | 2.07  | NA      | NA      | NA      | NA      | NA    | NA    |
| rno_miR_664    | 22.7 | 16.2 | 15.1 | 15.1 | 1.22  | 1.06  | 0.48698 | 0.71082 | 0.85202 | 0.88409 | 0.469 | 0.382 |
| rno_miR_7      | 21.6 | 9.8  | 4.75 | 5.5  | 2.56  | NA    | NA      | NA      | NA      | NA      | NA    | NA    |
| rno_miR_7_AS   | 32.5 | 21.8 | 12   | 9.69 | 1.33  | 1.31  | NA      | NA      | NA      | NA      | NA    | NA    |



**Figure S2. miRNA binding regions in mouse Hsp20 3'-UTR**

hsa-miR-612  
 GGGTCCCAGCTGCACAGGACCGAACCCAGGAAGCCTCTTTAGGCTCTCTTTTAA **AAGCCGATCTGACTCCACTGCC**

*mmu-miR-695*  
**CAGCCAGATGTCCCAATCGCCG**TCAAGACAGCCTTTCCCAACCACACCTAGATGTCCTTCGGAGACCTTTCCACCCC

*mmu-miR-320*  
 TAAGCCTACCTGAGCCCTAGTAACCTAGACAGCCTCCC **TAAGCCCTCTCCAGCTTTC**CGGCCCGACCCAGGACAC

CTCTCTAGGGACGCTACTGTCACCCCTCAGTCAAGGCTCCCATCAAATTGACCCCACTTTGGGCTTCTATCACCACG

hsa-miR-602      *hsa-miR-630*  
 CAGGCCTC **CTACCGCACTTGTAACCTGTGTA**GAATACCCCAAGGTGACACCAGAGTACAGTGTAGTACCTAATTCTC

CACATGGAGAACTGCATGGGCTTTCCACATCAGAACATCCAAGCCTAGTCCACCAGTCCTACCCACTAGTCCTGT

TCTTGTAACATAATGCTCCTCTGCCAGCCCACTTTTCAGACTTAAAACTCCAGGCACCTAAATTCTTGAATACTATT

*mmu-miR-450b\**  
 CTGACTTCCA **ATTCTTGGGAAA**ACTATTCCCAACTAACCAGGAACCCCAAACCTCAAACCTGTATGGACACTTCAACT

hsa-miR-601      *mmu-miR-184*  
**TCTCCAGATGTGCTAGGCCA**ATGAACAAGA **ACCCTTGAGTTCCTCTGTCTT**GGCTGCCCATCTGCAGCCAGATGTC

*mmu-miR-685*      *mmu-miR-409*  
 TTAGGGAGC **CTCCTTCACATCTGCCATTCT**CTAAGGT **CACACCTTCACTGCCAACATT**CCCATCTCCGCAGGCCTT

*hsa-miR-519b*  
 CCTACCAT **CAGTCCCAATAAATGCACTTG**AGATTG

## Supplemental References

- 1 Ren X, Wang Y, Jones WK. TNF- $\alpha$  is required for late ischemic preconditioning but not for remote preconditioning of trauma. *J Surg Res.* 2004; 121: 120–129.
- 2 Zhang X, Leung YK, Ho SM. AP-2 regulates the transcription of estrogen receptor (ER)-beta by acting through a methylation hotspot of the 0N promoter in prostate cancer cells. *Oncogene.* 2007; 26:7346-7354.
- 3 Sartor, M., Schwanekamp, J., Halbleib, D., Mohamed, I., Karyala, S., Medvedovic, M., and Tomlinson, C. R. (2004) *BioTechniques* 36, 790–796.
- 4 Smyth, G. K. (2004) *Stat. Appl. Genet. Mol. Biol.* 3, Article3.
- 5 Dudoit, S., Yang, Y. H., Callow, M. J., and Speed, T. P. (2002) *Statistica Sinica* 12, 111–139.
- 6 Sartor, M. A., Tomlinson, C. R., Wesselkamper, S. C., Sivaganesan, S., Leikauf, G. D., and Medvedovic, M. (2006) *BMC. Bioinformatics* 7:538
- 7 Fan GC, Yuan Q, Zhao W, Chu G, Kranias EG. Junctin is a prominent regulator of contractility in cardiomyocytes. *Biochem Biophys Res Commun.* 2007; 352(3):617-22.
- 8 Fan GC, Gregory KN, Zhao W, Park WJ, Kranias EG. Regulation of myocardial function by histidine-rich, calcium-binding protein. *Am J Physiol Heart Circ Physiol.* 200;287(4):H1705-11.
- 9 Fan GC, Chu G, Mitton B, Song Q, Yuan Q, Kranias EG. Small heat-shock protein Hsp20 phosphorylation inhibits beta-agonist-induced cardiac apoptosis. *Circ Res.* 2004; 94:1474-1482.

- 10 Fan GC, Ren X, Qian J, Yuan Q, Nicolaou P, Wang Y, Jones WK, Chu G, Kranias EG. Novel cardioprotective role of a small heat-shock protein, Hsp20, against ischemia/reperfusion injury. *Circulation* 2005; 111:1792-1799.
- 11 Krützfeldt J, Rajewsky N, Braich R, Rajeev KG, Tuschl T, Manoharan M, Stoffel M. Silencing of microRNAs in vivo with 'antagomirs'. *Nature*. 2005; 438: 685-689.
- 12 Carè A, Catalucci D, Felicetti F, Bonci D, Addario A, Gallo P, Bang ML, Segnalini P, Gu Y, Dalton ND, Elia L, Latronico MV, Høydal M, Autore C, Russo MA, Dorn GW 2nd, Ellingsen O, Ruiz-Lozano P, Peterson KL, Croce CM, Peschle C, Condorelli G. MicroRNA-133 controls cardiac hypertrophy. *Nat Med*. 2007; 13: 613-618.
- 13 Krützfeldt J, Kuwajima S, Braich R, Rajeev KG, Pena J, Tuschl T, Manoharan M, Stoffel M. Specificity, duplex degradation and subcellular localization of antagomirs. *Nucleic Acids Res*. 2007; 35: 2885-2892.
- 14 van Rooij E, Sutherland LB, Thatcher JE, DiMaio JM, Naseem RH, Marshall WS, Hill JA, Olson EN. Dysregulation of microRNAs after myocardial infarction reveals a role of miR-29 in cardiac fibrosis. *Proc Natl Acad Sci U S A*. 2008; 105:13027-13032.
- 15 Fan GC, Yuan Q, Song G, Wang Y, Chen G, Qian J, Zhou X, Lee YJ, Ashraf M, Kranias EG. Small heat-shock protein Hsp20 attenuates beta-agonist-mediated cardiac remodeling through apoptosis signal-regulating kinase 1. *Circ Res*. 2006; 99:1233-1242.
- 16 Tili E, Michaille JJ, Cimino A, Costinean S, Dumitru CD, Adair B, Fabbri M, Alder H, Liu CG, Calin GA, Croce CM. Modulation of miR-155 and miR-125b levels following lipopolysaccharide/TNF-alpha stimulation and their possible roles in regulating the response to endotoxin shock. *J Immunol*. 2007; 179:5082-5089.
